## **Anaphase Promoting Complex activity mediates clinical responsiveness to recurrent canine lymphoma**

Arnason<sup>1\*</sup>, T.G., MacDonald-Dickinson<sup>7</sup>, V., Davies<sup>2,3</sup>, J.F., Lobanova<sup>1</sup>, L., Gaunt<sup>7</sup>, C., Trost<sup>5</sup>, B., Waldner<sup>5</sup>, M., Froese<sup>2</sup>, P., Borrowman<sup>2</sup>, D., Marwood<sup>2</sup>, H., Gillespie<sup>3,4</sup>, Z.E., Vizeacoumar<sup>6</sup>, F.S., Vizeacoumar<sup>6</sup>, F.J., Eskiw<sup>4</sup>, C.H., Kusalik<sup>5</sup>, A., and Harkness<sup>2,3\*</sup>, T.A.A.

Departments of:

Medicine<sup>1</sup>,

Anatomy and Cell Biology<sup>2</sup>,

Biochemistry, Microbiology and Immunology<sup>3</sup>,

Food and Bioproduct Sciences<sup>4</sup>,

Computer Sciences<sup>5</sup>,

Pathology and Laboratory Medicine<sup>6</sup>,

Small Animal Clinical Sciences, Western College of Veterinary Medicine<sup>7</sup>,

University of Saskatchewan,

**\*Correspondence to:** Terra G Arnason/Troy A.A. Harkness, **e-mail:** [terra.arnason@usask.ca](mailto:terra.arnason@usask.ca) or [troy.harkness@usask.ca](mailto:troy.harkness@usask.ca)

**Key words:** Multiple Drug Resistant cancer, Anaphase Promoting Complex, canine cancer model, cell culture, metformin

## ABSTRACT

Like humans, canine companions spontaneously develop lymphomas that are treated by a cocktail of chemotherapy drugs. However, canines have high rates of developing multiple drug resistance (MDR), shortened clinical timelines and easy tumor accessibility, making them excellent models to study MDR mechanisms. Previously, we used *in vitro* cell models to demonstrate that metformin resensitized MDR cells to chemotherapy and prevented MDR development. Here, we used metformin to understand the *in vivo* molecular mechanisms regulating MDR development and reversal. Metformin was added to chemotherapy in MDR canines, reducing MDR biomarkers within all tumors tested, with one canine entering remission after prior repeated relapses. We employed microarray analyses to identify molecular networks involved in MDR development and the impact of metformin treatment. Tumor sampling throughout entry to remission and subsequent relapse allowed correlation of gene expression profiles to MDR tumor behavior. We discovered that the Anaphase Promoting Complex (APC), a ubiquitin-ligase regulating cell cycle progression, was impaired in MDR samples. *In vitro* tests demonstrated that APC activation resensitized MDR cells to chemotherapy. The companion canine, therefore, is a powerful translational MDR model that has revealed the APC as an underlying cellular mechanism associated with treatment resistance, and a novel potential therapeutic target.

## INTRODUCTION

It is estimated that one-in-two people will develop cancer in their lifetimes, a staggering statistic to consider. Advances in surgical techniques, cancer-specific therapies and small molecule inhibitors have contributed to survival and disease-free duration [1]. However, the development of multiple drug resistance (MDR) to first-line chemotherapeutic agents leaves few, if any, proven treatment options, and may signal a shift to palliative support rather than active therapy [2-6]. MDR can be inherent (prior to treatment) or acquired at any time after initial treatment responsiveness, with recrudescence as much as 20 years later [7,8]. Malignancies of the breast, blood, lung and colon are particularly renowned for their relatively high rates of treatment resistance and acquired MDR. A need for new treatment options is required for this cohort suffering from MDR cancers.

Our goals are to identify the underlying cellular pathways involved in MDR development, and to identify novel agents that will promote reversal or prevention of MDR cancers. We have used *in vitro* MDR cell culture models of a variety of human cancers to identify molecular biomarkers and their post-translational modifications (phosphorylation and acetylation) that correlate with both entry to, and exit from, an MDR state [9-13]. Simultaneously, we have evaluated the utility of several oral agents with unexpected anti-cancer activity that returns MDR cells to treatment-sensitive states [10,11,13]. Of relevance here, we found that repurposing the antidiabetic drug metformin in breast cancer cells *in vitro* proved effective at both reversing preexisting treatment resistance in MDR cell populations, and also preventing MDR onset [13]. Metformin is generally believed to primarily mediate metabolic changes in response to insulin resistance in individuals with Type 2 diabetes through the AMP-dependent protein kinase (AMPK) [14,15]. Although metformin was also shown to slow the growth of multiple human cancer cells *in vitro* [16], its specific effects of MDR malignancy had not been evaluated. We observed that resensitization of cells by metformin was associated with increased global histone H3 Lys9 acetylation (a marker of cell

killing) [10-13,17] and  $\gamma$ H2AX phosphorylation (a marker of DNA damage) [18]. We also observed that the anti-cancer properties of metformin in MDR breast cancer cells *in vitro* was AMPK-independent in our hands, and appeared to induce histone acetylation via indirect inhibition of histone deacetylases (HDAC) [13]. Compounds with HDAC inhibitory (HDACi) capacity are currently in Phase III cancer trials, with several approved for clinical use [19,20].

Here, we used metformin as a tool to understand MDR development and reversal *in vivo* using the companion canine model of lymphoma that is clinically resistant to therapy. Metformin treatment reduced the levels of MDR protein biomarkers in all tumors sampled. Our analysis of an individual canine that reached full remission while taking adjunct metformin allowed us to carry out a microarray analysis of gene expression changes within the tumor that correlated with clinical treatment responsiveness. Within both canines (*in vivo*) and canine cell culture (*in vitro*), we demonstrate that impairment of Anaphase Promoting Complex (APC) activity occurs concomitantly with MDR development and that activation of the APC by a small chemical APC activator can reverse drug resistance. The APC is a large evolutionarily conserved ubiquitin ligase that is primarily considered to target proteins that inhibit cell cycle progression through mitosis and G1 for ubiquitination and proteasome-dependent degradation [21,22]. More recently, accumulating evidence implicates the APC in cell cycle-independent functions such as neurogenesis, longevity, stress response and genome stability [23-26]. The idea that APC function is critical to ward off cancer is gaining traction, as the APC has been shown to be important for DNA repair decisions [27,28], to preserve genomic stability in humans and yeast [29,30], and APC impairment is associated with onset of drug resistance [31,32]. Our results, therefore, identify the APC as a potential therapeutic target that protects the genome, thereby delaying the development of aggressive treatment resistant tumors.

## RESULTS

### **Companion canines with non-Hodgkin-like lymphoma are strong models of MDR malignancy.**

Our proximity to the largest Veterinary College in western Canada provided us an opportunity to obtain treatment resistant tumor samples representative of *in vivo* events as companion dogs present regularly to the oncology clinic for diagnosis and chemotherapy. Canine lymphoma is orthologous to non-Hodgkin lymphoma of B- and T-cells and has a relapsing-remitting course with a high incidence of terminal MDR transformation [33-35]. The superficial nature of the lymph node enlargements allows easy access to tumor sampling in a non-invasive manner. Standard clinical management of lymphoma in companion canines involves repeated weekly appointments, providing an opportunity to sample a given tumor over time during the chemotherapeutic regimen. To test our *in vitro* observations that metformin reverses MDR protein markers and resensitizes MDR cells to chemotherapy, we treated companion canines that developed MDR lymphoma with metformin. We obtained tumor samples from 8 canines in total, 2 from naïve drug sensitive canines and 6 that had failed their drug therapy. Details of the 4 canine subjects used for our complete analyses are shown in Supplemental Table 1. Canine subjects 1-4 were clinically unresponsive to chemotherapy, were identified as having B-cell lymphoma and all received oral metformin, as described. Canine subjects 5 and 6 were treatment resistant, but were not treated with metformin and were not followed any further. Canine subjects 7 and 8 were treatment sensitive, were not staged, and did not receive metformin.

### **Canines with drug resistant lymphoma overexpress proteins associated with drug resistance, and adjunct metformin therapy results in reduced MDR protein biomarker levels**

We used Western analyses to determine the relative abundance of the MDR biomarker, MDR-1, in cancerous lymph nodes, as compared to skin control samples, before and after metformin use. We used fine needle aspirates (FNAs) to obtain tumor samples from 5 MDR canines (canines 1-4, 6), who all expressed high levels of MDR-1 in their tumor sample compared to their control sample (Fig. 1). We

assessed additional MDR protein markers in canine 3 tumor samples, such as BCRP (Breast Cancer Resistance Protein), HIF1 $\alpha$  (Hypoxia Inducible Factor 1 alpha), and phosphorylated S6K, and found them to all be elevated (Fig. 1C). Samples were then taken at the indicated weeks after metformin initiation. Remarkably, MDR-1 protein, and the other MDR protein markers in canine 3, rapidly declined or disappeared with metformin ingestion (Fig. 1). An MDR-1 signal was not detected in canine subjects 7 and 8 as expected since they were treatment-sensitive (Fig. 1B). Thus, the *in vitro* observations showing loss of MDR markers following metformin treatment [13] are also observed *in vivo*, and potentially clinically relevant as one canine experienced a period of remission following metformin exposure.

### **Metformin as adjunct therapy was nontoxic and well-tolerated**

We had already established that the dose of metformin used in this study is nontoxic to canines and generally well tolerated [36,37]. Metformin as monotherapy is not presumed to be highly effective at killing cancerous lymphoma cells, which was supported clinically by the ongoing lymphadenopathy in our subjects. Generally, there was a decrease in food interest and this was interpreted to indicate possible gastrointestinal intolerance of metformin [38]. Laboratory investigations spanning metformin monotherapy in these subjects did not show a metabolic acidosis (data not shown), a relevant consideration given that lactic acidosis has been reported as a rare complication of metformin use in humans with renal failure [39,40]. There was no alteration to differential cell counts, with immature bands being equally present before and after weeks of treatment. Blood glucose levels remained normal, as did renal function. The remainder of the bloodwork was unchanged following metformin addition. Although the dual therapy did not, for the most part, result in measurable decreases in lymph node burden, there was an increase in energy and activity reported even with metformin still being administered. A slight elevation in total lactate levels was seen in canine subject 3 after the first week on metformin therapy (3.59 mmol; normal < 2.5 mmol), which is not unexpected in rapidly proliferating malignancies

such as lymphoma and was likely multifactorial including the comorbid presence of mild anemia, and a significant urinary tract infection.

### **Microarray analyses of canine tumor mRNA validates increased expression of MDR-1 and reduction of MDR-1 by metformin**

We isolated RNA from tumor cells and skin biopsies obtained from 4 treatment resistant companion canines in our study (canines 1-4). We used 2 independent samples from canine 1 for this analysis, labelled canine 1 #1 and #2. We performed microarray analyses (Agilent Canine Microarrays; 25,000 annotated genes) to identify genes that were differentially expressed in the tumor samples compared to a normal skin sample (canine 2), and in the tumors before and after metformin treatment (canines 2 and 4). The datasets have been deposited at the GEO repository (GEO accession # GSE121242; <https://www.ncbi.nlm.nih.gov/geo/query/acc.cgi?acc=GSE121242>). To validate our Western detection of increased expression of MDR-1, we first analyzed expression of the ABC transporter family members present on the array. We observed expression of ABCB1 mRNA (encoding MDR-1) above 3 FC in only one tumor sample (Canine 4; Supplemental Fig. S1), with mild elevation in canine 2. There were 2 probes for ABCB1 on the array, and both were elevated in canine 4 well above the 3 FC cutoff (Log base 2 equals a fold change (FC) of 4), and mildly so in canine 2. ABCB1 mRNA expression was unaffected in canine 3. Since MDR-1/ABCB1 protein was elevated in all MDR canines, the lack of consistent elevated ABCB1 mRNA suggests that increased MDR-1 protein levels can occur post-translationally. The array contained probes for 40 ATP transporters in total, and only ABCB3 was elevated above 3 FC in all MDR canines at the mRNA level (one of the canine 1 samples (#1) was below 3 FC). Expression was elevated in the MDR canines (with at least three out of four 2-fold or higher) for 4 additional ATP transporters (ABCA3, ABCC10, ABCG1, and ABCA4). Next, we averaged expression from the tumor samples before metformin treatment from canines 2 and 4, normalized to the control sample, and compared this to the average of canines 2 and 4 treated with metformin normalized to samples before treatment

(Supplemental Figure S1). Consistent with metformin reducing the protein levels of ABCB1 (MDR-1; Fig. 1), expression of ABCB1 mRNA was also reduced by metformin in the 2 canines. There were four other ABC transporters that showed this pattern, with elevation in the MDR tumor at least 2-fold greater than in the control sample, and reduced by metformin (ABCA3, ABCC10, ABCG1, and ABCB3). While MDR-1 and other ABC transporters were expressed in these tumors, and while possible that this may be a contributing factor in MDR development, we observed that overexpression of ABC transporters was not a common occurrence in these canines. Thus, we sought to identify other possible mechanisms of MDR development by looking for common differentially expressed genes in the tumors of the 4 MDR canines (canines 1-4).

**A 290 gene set overexpressed >3-fold in tumour vs control was common to the 4 MDR canines.**

Between 875 (canine 2) and 1365 (canine 3) genes were overexpressed >3-fold in the 4 canine datasets (Supplemental Table S2). We used Venn diagrams to identify genes that were overexpressed greater than 3-fold that were common to the 4 MDR canine datasets, which resulted in 290 genes (Fig. 2A; Supplemental Table S2). Using Cytoscape and Reactome FIViz [41], we discovered that 146 of these genes had functional relationships. In total, 13 different gene clusters were identified (as defined by different colour spheres and astericks; Fig. 2B; Supplemental Table S3). Genes within the clusters are listed in Supplemental Table S3, and the enriched genes within the network pathways are shown in Supplemental Table S4. A particularly tight interconnected gene cluster (shown in green in Fig. 2B) was identified that was involved in multiple aspects of mitosis. A subsequent analysis, using the software ‘Search Tool for the Retrieval of Interacting Genes/Proteins’ (STRING, version 10.5), identified 186 genes from the 290 gene set that were involved in multiple interconnected networks/clusters (Supplemental Fig. S2; Supplemental Table S2). One such cluster (cluster 2) was composed almost exclusively of genes encoding proteins involved in mitotic progression (yellow nodes in Supplemental Fig. S2, highlighted in yellow in Supplemental Table S5). Clusters 3 and 6 also contained many genes



involved in mitotic progression, as well as genes required for DNA repair and replication (green and purple nodes in Supplemental Fig. S2; highlighted in green in Supplemental Table S5). These gene clusters highlight that regulated progression through mitosis and adherence to checkpoints is vital to maintaining cell health and avoiding cancer.

Both Cytoscape with ReactomeFIViz and STRING identified the same cluster of mitotic genes, in which many of the genes encoded substrates of the Anaphase Promoting Complex (APC; 20 genes, marked by \*, Supplemental Table S5; nodes circled in red in Fig. 2B). The APC is a ubiquitin protein ligase that targets proteins that inhibit cell cycle progression for ubiquitin- and proteasome-dependent degradation [22,42-40]. If APC substrates are elevated, even at the mRNA level (APC regulatory and substrate mRNAs often peak during G2/M, then decline once the protein is degraded [43,44]), then this suggests APC function is impaired. Furthermore, proteins associated with the Spindle Assembly Checkpoint (SAC) and the kinetochore, which predominantly inhibit APC activity prior to mitosis [45], are elevated (15 genes, marked by \*\*, Supplemental Table S5). Moreover, proteins that maintain chromosome condensation (the condensin complex) are also elevated (3 genes; marked by \*\*\*, Supplemental Table S5). Interestingly, a recent study comparing differentially expressed genes between normal human ovarian tissue and ovarian cancer, and carboplatin-sensitive and resistant ovarian tumors [46], identified a similar set of genes identified in our canine study; of the 5 top genes identified in their study (GNAI1, NCAPH, MMP9, AURKA and EZH2), three were identified in our study (NCAPH, AURKB (rather than AURKA) and EZH2). Taken together, our work suggests that MDR development in these 4 canines is associated with impaired APC activity. Consistent with this, we demonstrated using the Cancer Genome Atlas (TCGA; <https://portal.gdc.cancer.gov/>) database that the APC substrates PTTG1, DLGAP5/HURP [26] and CCNB1/Cyclin B1 (Supplemental Fig. S3) are elevated in at least 24 different human cancers from patient samples.

## **Mitotic and G1 APC substrate gene expression is elevated in treatment resistant tumors compared to normal controls.**

The APC targets proteins for degradation in both mitosis (M) and G1, and we asked if there was a differential impact on expression in MDR samples compared to control. Different coactivators interact with the APC to promote cell cycle progression; CDC20 during mitosis (APC<sup>CDC20</sup>) and CDH1/FZR1 to exit mitosis and progress through G1 (referred to as APC<sup>CDH1</sup> hereafter) [21-23]. Therefore, we separated all APC targets we could detect in the array into M vs G1 targets (11 mitotic substrates and 22 G1 substrates) to assess if there were differences in expression between the clusters (Fig. 3). In some cases APC<sup>CDH1</sup> will target residual APC<sup>CDC20</sup> substrates, such as PLK1, PTTG1 and CCNA2. It is clear that there are unique differences between APC target gene expression in transcripts produced from genes encoding APC targets in all 5 MDR samples (2 samples were analyzed for canine 1, which were very similar), whether considering M or G1 targets. We consistently observed that the mitotic targets were overexpressed in MDR tissue on average to a greater extent than that observed for G1 substrates (Supplemental Fig. S4), although many G1 substrates were also highly expressed. The APC coactivator CDC20 is one of the mitotic substrates that is highly expressed. APC activity is inhibited by the SAC prior to mitosis via interactions with CDC20, which blocks CDC20's ability to interact with substrates, until all metaphase chromosomes are firmly attached to kinetochores [45-49]. It is interesting to note that many SAC components that are activated by incomplete attachment of microtubules to kinetochores, and kinetochore factors (BUB1, CENPL, CEP152, NUF2, SPC24, SPC25, NEK2, INCENP, SGO1L, MLF1IP, CASC5, NDC80, and ASPM), are all highly overexpressed in MDR canines (Supplemental Tables S2 and S3). Elevated expression of SAC and kinetochore components (NCAPG, NCAPG, SKA3, AURKB, NEK2) is associated with cancer [50-55], and is consistent with APC impairment.

Coordinated gene expression of functionally associated genes may be due to activation by a one or more common transcription factors. To gain insight into this possibility, we implemented a Cis-element Over-

representation (CLOVER) Analysis [56] using the Transfac Database, to analyze the 290 gene list. This analysis identifies over-represented transcription factor binding sites within the promoters of genes. This analysis revealed that 230 of the genes have FOXO3A and/or FOXM1 binding sites, as well as 241 sites for the SP1-4 transcription factor family. A Venn diagram shows that 225 of the genes contain sites for all 3 sets of transcription factors (Supplemental Fig. S5). Our finding that FOXM1 may be highly involved in the expression of the 290 gene list is significant since FOXM1 is an APC<sup>CDH1</sup> substrate [57]. As can be seen in Fig. 3, FOXM1 expression is elevated in all canine tumors, providing a mechanism for how the APC substrates can be coordinately expressed in the canine tumors. Further work will need to be done to work out the details of this observation.

### **Microarray reveals reversible changes in APC target gene expression that correlate with altered clinical treatment responses.**

Canine 4 exhibited a successful remission (temporary) based on the near disappearance of all palpable lymph nodes. It should be highlighted that this dog had failed both repeat CHOP therapy and rescue therapy in the months prior to our study entrance. Clinical remission occurred when CHOP was again trialed but with the addition of oral metformin. After 8 weeks in remission the subject relapsed and expired. RNA samples were obtained prior to metformin therapy, during remission while on metformin therapy as the tumors shrank, and from the tumor after relapse. We identified a set of 27 genes that were upregulated >3 FC in the MDR tumor, decreased >2 FC upon remission and then elevated once again >3 FC upon relapse (Fig. 4A). We performed STRING on this set of genes and found that they were highly enriched in APC substrates (Fig. 4B, highlighted with a black ring around the node; Supplemental Table S6). This provides additional support for the idea that APC function is associated with the clinical manifestation of the disease. Further analyses of APC mitotic and G1 substrates in our three temporal samples from canine 4 revealed that the mitotic APC substrates that were elevated in tumors were remarkably reduced during remission, and upon relapse, were elevated beyond the initial MDR

lymphoma cells (Fig. 4C). This was also observed for the bulk of the APC G1 substrates (Fig. 4C), but several did not show this trend (FOXN1, CDC25A and SKP2). We validated several of the microarray hits by performing qRT-PCR on the original FNA samples from chemoresistant and remission samples in canine 4, for the genes encoding HURP and Securin (Fig. 4D). We observed that gene expression is significantly decreased in the treatment-sensitive/remission sample as compared to the MDR sample.

### **APC substrates are elevated *in vitro* in OSW lymphoma cells selected for DOX resistance.**

We queried whether APC impairment may be a common mechanism in MDR transformation. To extend the observations that APC activity is impaired *in vivo* in drug resistant clinical samples, we obtained the canine OSW lymphoma cell line [58] to test whether our *in vivo* observations were valid *in vitro*. We selected OSW cells for resistance to Doxorubicin (OSW<sup>DOX</sup>) according to our established methods [12,13]. We observed that OSW<sup>DOX</sup> cells overexpressed protein biomarkers of MDR, including BCRP, MDR-1, and HIF1 $\alpha$  (Fig. 5A). We next performed qPCR on OSW parental and resistant cells using primers against the APC substrates *PTTG1*, *DLGAP5* and the MDR marker *MDR1* (Fig. 5B). This analysis confirmed that APC substrates are elevated at the mRNA level in *in vitro* selected cells similar to *in vivo* MDR canine tumor samples, consistent with the idea that the APC is not targeting proteins required for the expression of the APC substrates for degradation. As expected, we observed that APC protein substrates were increased specifically in the MDR cell populations, as noted by the increased protein abundance of HURP, Cyclin B1 and Securin (Figs. 5C and 5D). If APC mitotic substrates are accumulating in MDR cells, indicating that APC activity is impaired, then we expected that MDR cell populations should accumulate in the mitotic phase of the cell cycle. To address this question, we analyzed cell populations derived from OSW DOX sensitive and resistant cells by flow cytometry (Fig. 5E). The results show that both sensitive and resistant cell populations are predominately in G1. A previous study of 182 breast cancer patient samples revealed that 58% of cases were characterized with high levels of MDM2 staining, defining G1/S replicating cells, yet also contained high levels of the

mitotic APC substrates GMNN, PLK1 and Aurora A [59]. This set of cases was described as having accelerated cell cycle progression, and was found to be associated with a higher risk of relapse and with high-grade triple negative subtypes. This is also known as mitotic slippage, where cells can bypass a mitotic arrest and progress into G1 [60]. Mitotic slippage can occur when the SAC is overridden and this is associated with an MDR phenotype. Cases showing G1 arrest (high MDM2) and low mitotic markers, similar to DOX sensitive OSW cells, were found to be associated with a low risk of relapse. Our work revealing that OSW<sup>DOX</sup> cells exhibit high levels of APC mitotic substrates in a population predominantly in G1 is consistent with a higher grade cancer and has the potential to serve as a diagnostic marker for aggressive tumor progression.

**Activation of the APC reduces APC substrates in MDR cells and resensitizes MDR cells to therapy.**

If impaired APC activity correlates with MDR development, we predicted that activating the APC should reverse the MDR phenotype by resensitizing these cells to chemotherapy. To directly investigate this idea, we obtained a commercially available APC activator called MAD2 Inhibitor-1 (M2I-1) [61]. This small molecule compound disrupts the MAD2-CDC20 interaction, thereby negating SAC inhibition of the APC. This results in the release of CDC20 to enable interactions with, and activation of, the APC. We treated OSW<sup>DOX</sup> cells with 1  $\mu$ M M2I-1 for 48 hours (previously optimized, data not shown) and assessed the protein levels of the APC substrates HURP and Securin, and the load control Tubulin (Fig. 5F). As shown in the quantitative analysis in Fig. 5G, HURP and Securin levels in OSW<sup>DOX</sup> cells dropped to levels lower than in sensitive cells upon M2I-1 treatment. This is consistent with the idea that APC E3 activity was being restored with the M2I-1 compound. To test if APC activation correlated with a simultaneous enhancement in chemosensitivity, we tested the effects of M2I-1 on cell viability in the presence of a toxic dose of DOX (1  $\mu$ M) in OSW and OSW<sup>DOX</sup> cell populations (Fig. 5H). M2I-1 (1 and 5  $\mu$ M) proved to be nontoxic to both parental and selected cells in the absence of DOX. However, there was a striking dose-dependent killing of OSW<sup>DOX</sup> cells when M2I-1 and DOX were used in combination

that reached the chemosensitivity of the parental cells. This is consistent with a recent study showing that M2I-1 disrupts CDC20-MAD2 interactions *in vivo*, leading to increased sensitivity of cancer cell lines to nocodazole and taxol *in vitro* [62]. Taken together, the experiments presented here support our hypothesis that activation of the APC in MDR cells will enhance E3 activity and resensitize MDR cells to chemotherapy.

## **DISCUSSION**

In the work presented here we used metformin as a tool to elucidate the molecular mechanisms at play when cancer progresses to an MDR state and the molecular networks involved in reversing MDR. Our previous work demonstrated that metformin could resensitize human MCF7 estrogen receptor positive (ER<sup>+</sup>) breast cancer cells selected for resistance to Doxorubicin (DOX) to DOX once again [13]. Furthermore, pretreatment of MCF7 with metformin delayed selection against DOX, indicating a prevention of MDR development. This may in part explain the meta-analysis results indicating that individuals taking metformin for Type 2 diabetes therapy not only have a lower incidence rate of many common cancer types, but also appear to respond more robustly to therapy [63-65]. Translation of our *in vitro* results to an *in vivo* model could provide enormous potential for humans who develop resistance to therapies designed to treat their disease, and reveal the underlying mechanisms that are altered specifically in MDR malignancies.

The canine model of cancer is considered an excellent model for human translation [66-69]. Thus, we employed companion canines recruited to the Western College of Veterinary Medicine at the University of Saskatchewan with treatment resistant lymphoma into our study to reveal the gene expression differences between tumors with variable treatment responsivenesses, as well as to determine the effects of metformin on cancer progression in these animals. Six of the canines recruited into this study

expressed MDR-1, a drug transporter found elevated in many cases of drug resistant cancers in humans [9,70]. Four of these canines were treated with metformin, and in all cases, MDR-1 proteins levels decreased. One of the canines (Canine 4), after failing all previous rescue therapies, did go into remission, providing evidence that metformin has the potential to reverse drug resistance *in vivo*. However, it should be noted that the canines enrolled in our study were terminally ill, and although there were signs of improvement in their behavior, there was little sign of reduced tumor size aside from the one canine that did go into remission. Future studies will focus on naïve dogs as they enter the clinic for a blinded study with metformin to determine whether metformin can delay the onset of drug resistant lymphoma.

We used microarray technology to identify differentially expressed genes in MDR tumors compared to normal skin tissue in the 4 animals, and in tumors before and after metformin treatment in 2 animals. We also identified differentially expressed genes following remission and relapse of the one canine that had a full, yet transient, response. We began our analysis by assessing if expression of any of the ABC transporters found on the array was altered in tumors or following metformin treatment. Many ABC transporters are thought to play a large role in cancer development, as they are effective drug-efflux pumps and can lower the intracellular concentrations of chemtherapeutic agents below useful levels [71-73]. Pharmaceutical efforts to design drugs that target MDR-1 in the clinic have failed in early human trials [9,70,74]. Interestingly, not all of the 4 canines overexpressed MDR-1 (*ABCB1*) mRNA, even though they overexpressed MDR-1 protein (Supplemental Figure S1), suggesting that elevated MDR-1 protein levels may be a result of post-translational events. In fact, only one ABC transporter, *ABCB3*, was overexpressed greater than 3 FC in all 4 canines (although it was less than 3 FC in canine 1 sample #1). Five of the transporters were elevated in at least 3 of the canines (*ABCA3*, *ABCC10*, *ABCG1*, *ABCC1* and *ABCA4*), but the levels for the most part failed to surpass 3 FC. We also determined the effect of metformin on ABC transporter expression and found that metformin only reduced expression in a subset, including *ABCB1* (Supplemental Figure S1). From these observations, we concluded that it is unlikely

that transcriptional regulation of ABC transporters plays a significant role in MDR development in our model.

Our analyses of overexpressed genes in the MDR tumors of the 4 canines revealed a common set composed of 290 genes overexpressed at least 3-fold (Fig. 2A). We used Cytoscape and STRING databases to analyze this gene set and discovered that 146 and 186 of the 290 genes, respectively, fit into highly interconnected clusters of genes (Supplemental Fig. S2; Supplemental Tables S2, S3 and S5). One cluster (cluster 2; Supplemental Table S5), highlighted in yellow, is highly enriched for genes encoding proteins involved in mitotic cell cycle progression, especially degradation substrates of the APC and components of the kinetochore and SAC. A second cluster (cluster 4), highlighted in medium aqua, is enriched in signaling molecules, whereas a third cluster (cluster 3), highlighted in green, contains genes required mostly for DNA-dependent functions (ie., DNA repair, chromosome condensation and kinetochore/centromere assembly). Cluster 6, highlighted in purple, mostly contains genes involved in maintaining genome stability. Clusters 2 and 4 are joined by the Ras homolog gene family, member H (RHOH). Clusters 2 and 3 are connected by DNA topoisomerase II A (TOP2A). Cluster 6 is interwoven between clusters 2 and 3. Visually, cluster 2 is clearly the central theme of the common set of genes, indicating that tumor development depends on impaired progression through mitosis, potentially controlled by APC activity given our other clustered genes of commonality.

Elevated APC substrates can have at least 2 readouts. First, many substrates, such as CCNB2, PLK1 and CDC20, are both APC activators and APC substrates. Elevation of these mRNAs and proteins could result in persistent APC activity that impacts the cell. The APC targets proteins for degradation, not mRNA, but APC substrates are often transcriptionally active just prior to when they are required [43,44]. This is controlled by transcription factors that are themselves cell cycle regulated by the APC, such as FOXM1 [56]. The mRNAs encoding many APC substrates in yeast are also cell cycle regulated, with



synthesis of their corresponding proteins peaking following the mRNA expression peak [75-77]. In fact, transcription factors that transcribe yeast APC substrates, such as Fkh1 [29] and Ndd1 [78], are targeted by the APC, thereby creating feedforward loops. This loop is further layered by the observation that the yeast Fkh2 transcription factor (also likely an APC target; our unpublished observation) recruits Ndd1 to chromatin of additional G2/M specific APC subunit promoters [79]. The accumulation of APC substrate mRNA, at least in part, is a result of impaired degradation of the transcription factors responsible for their synthesis. Increased accumulation of APC substrates like CDC20 has led to suggestions that inhibition of the APC, via down-regulation of CDC20, is important for cancer treatment [80,81]. However, other proteins, such as PTTG1 and DLGAP5 are not APC activators, but merely substrates. Elevation of these substrates, and many other APC substrates are linked with cancer and other diseases [26,80,82], and this is consistent with the idea that impaired APC activity is a primary driver of MDR development.

To validate the idea that APC is impaired in canines with MDR lymphoma, resulting in the likely accumulation of APC substrate mRNAs, we determined the fold change of the APC substrates we could identify in the canine array (Fig. 3). Almost all of the 33 substrates identified were elevated at least 3 FC; all mitotic substrates in all 4 canines and most of the G1 substrates (Fig. 3). Previous work has also demonstrated APC substrates to be elevated in cancer cells [80,82]. Furthermore, recent work comparing differential gene expression in drug sensitive and resistant ovarian tumor datasets [46] revealed a similar collection of genes that were identified by us; half of the 30 highly connected nodes they identified were associated with APC function or substrates. Consistent with these observations, remission and relapse of canine 4 following metformin treatment identified 27 genes that were upregulated in the tumor, down-regulated following metformin treatment, then upregulated again following relapse (Fig. 4A). These 27 genes were highly interconnected and mostly composed APC substrates (Fig. 4B), clearly placing the APC at a pivot point as a critical activity in maintaining cell health.

To further validate our results, qRT-PCR of RNA isolated from canine 4 tumor tissue before and after metformin treatment showed that the APC substrates HURP and Securin were indeed reduced following metformin therapy (Fig. 4D). Validation *in vitro* using canine OSW lymphoma cells selected for resistance to DOX confirmed that APC substrates were elevated in MDR cells compared to parental cells (Figs. 5B-5D). We further proposed that activation of the APC may increase cell health and may resensitize MDR to chemotherapy. Activation of the APC using a commercially available small compound that inhibits the MAD2-CDC20 interaction, M2I-1 [61], reduced APC substrate levels in the selected OSW cells and resensitized the selected cells to DOX again (Figs. 5F-5H). Our results demonstrate that impaired APC function may be a critical trigger leading to progression towards aggressive tumor behavior and decreased treatment responsiveness. We propose that targeting the APC for activation through pharmaceuticals may reverse MDR behavior, and thereby provide much needed treatment options for those suffering from untreatable tumors.

Taken together, the results presented here validate the companion canine as a powerful model of multiple drug resistant cancer that has allowed us to determine that the APC is important in cancer behavior and treatment sensitivity to chemotherapy. Impaired APC activity correlates with poor clinical outcomes, as well as MDR behavior. Exogenous activation of the APC corrected the impairment and restored chemosensitivity *in vitro*. Our work provides insight into the APC as a novel therapeutic target that may offer hope for individuals presenting with treatment-resistant malignancies, and may prove useful in preventing the development of resistance in cancer patients in the future.

## **MATERIALS AND METHODS**

### **Cell lines and materials:**

Canine OSW lymphoma cells were obtained from American Type Culture Collection (ATCC) in Manassas, VA, USA. Cells were cultured in 100 mm tissue culture dishes (Nalgene) in a humidified atmosphere (5% CO<sub>2</sub>) at 37°C. Non-adherent K562, Raji and OSW cells were cultured in RPMI 1640 media (Hyclone) with 10% FBS and antibiotics. All treatment compounds were reconstituted in dimethylsulfoxide (DMSO) except metformin (Sigma) which was reconstituted in molecular-grade water and filter sterilized prior to use. Drug treatments were applied at the concentrations and times as indicated. Flow cytometry was performed as described previously [10].

### **Doxorubicin-selection of MDR cell lines**

OSW parental cells were selected for drug resistance as previously described [12] with initial selection in the presence of 1  $\mu$ M Doxorubicin (DOX) for 48 hours. Following this treatment, the cells were washed with sterile PBS and allowed a 3-day recovery period. Drug resistance selection pressure was then reapplied to the cells by subculturing in the presence of 100 nM DOX for 2 weeks with fresh media changes every 3 days. Following the selection period the cells were subjected to MDR-1 Western blot analysis to verify the establishment of drug resistance and sensitivity to DOX using an MTT assay, as previously described previously [12] and below.

### **Western blot analysis**

Non-adherent OSW cells were captured by centrifugation at 1000 rpm and washed once with sterile PBS. Cell pellets were transferred to microtubes and resuspended in ice cold RIPA buffer. The cell suspensions were pulse sonicated and centrifuged to remove cell debris. The resulting cell lysates were subjected to Bradford protein analysis (BioRad) to facilitate equivalent protein loading during Western analysis. Cell lysates were treated with 5X Laemmli buffer containing  $\beta$ -mercaptoethanol, boiled to reduce viscosity and resolved by sodium dodecyl sulphate polyacrylamide gel electrophoresis (SDS-PAGE), and transblotted onto nitrocellulose membranes. Transblot efficiency was verified prior to immunoprobings

by nonspecific Ponceau S protein staining of the membranes. Following primary antibody incubation overnight at 4°C, the blots were probed with a 1:10,000 dilution of a secondary horseradish peroxidase (HRP) secondary antibody. Primary antibodies against MDR-1 (Abcam, 1:500, 180 kDa), BCRP (Abcam, 1:1,000, ~70 kDa), HIF1 $\alpha$  (Santa Cruz Biotechnology (SCBT), 1:500, 110 kDa), S6K<sup>phos</sup> (SCBT, 1:1,000, 60 kDa), HURP (Abcam, 1:1,000, 120 kDa), Cyclin B1 (Sigma, 1:1,000, 70 kD), Securin (Abcam, 1:1,000, 29 kDa), GAPDH (Abcam, 1:1,000, 55 kDa) and tubulin (Sigma, 1:1,000, ~50 kDa), were used in this study. The antigen/antibody target signals were detected using an enhanced chemiluminescent detection kit (ECL-BioRad) and chemoluminescent detection using BioRad VersaDoc molecular imager and Software. Cells were viewed with an Olympus BX51 fluorescence microscope 100x objective equipped with an Infinity 3-1 UM camera. Images were collected using Infinity Analyse software version 5.0. A.

### **MTT assay**

MTT (3-(4,5-dimethylthiazol-2-yl) 2, diphenyl-tetrazolium bromide) was used to measure the anti-proliferative effects of the compounds used in this study. MTT is a colorimetric cell proliferation assay based on the reduction of the yellow MTT compound to a purple-colored formazan product in the mitochondria of viable, living eukaryotic cells. Cancer cells were cultured in 6 well multi-well plates in phenol red-free medium to avoid interference with the analysis of the purple formazan product. The formazan product and spectrophotometric analysis was performed at 570 nm.

### **Canine clinical assessment and sample retrieval**

During routinely scheduled clinic visits at the Wester College of Veterinary Medicine, each companion canine was examined and samples were taken. At the first visit, a punch biopsy of unaffected skin was taken as a negative control and preserved for RNA and protein. Tumor samples were obtained by three fine-needle aspiration biopsies that were taken of a palpable superficial lymph node: the same node was

sampled over time for each canine. One FNA sample was placed immediately into Trizol to preserve RNA for subsequent RT-PCR analysis and in some cases microarray. The remaining two FNA samples were pooled and immediately frozen at -80°C for western analysis. As for cell culture lysates, FNA sample protein concentrations were determined by Bradford assay.

### **Microarray hybridization**

Total RNA from tumor and skin samples was shipped on dry ice and sent to the Laboratory for Advanced Genome Analysis at the Vancouver Prostate Centre for microarray analysis (<http://www.mafpc.ca/>). Total RNA was used as a template to create labeled cDNA using MessageAmp™ Premier RNA Amplification Kit and MessageAmp™ III RNA Amplification Kit (Applied Biosystems) according to the manufacturer's instructions. Labeled cDNA was hybridized on Agilent Canine Microarrays, which are comprised of more than 25,000 annotated genes. Scanning and data acquisition were obtained using the Illumina iScan scanner, raw data (idat files) were loaded into Illumina BeadStudio, without background subtraction, and exported for analysis. The data files have been deposited with the meta-database Gene Expression Omnibus (GEO accession # GSE121242; <https://www.ncbi.nlm.nih.gov/geo/query/acc.cgi?acc=GSE121242>) as of Dec. 1, 2018. Sufficiently high quality of extracted RNA was not available for all samples or at all time points, limiting the overall assessment possible. We were only able to extract RNA from the skin control from canine 2. Canine 4 was unique in providing multiple quality protein and RNA samples over time as the canine progressed through clinical relapse and regression. These samples entered the microarray for a temporal comparison, and protein samples were able to provide additional MDR protein biomarkers by western analysis.

### **Companion canine recruitment and characteristics**

The 8 canines in the study had been previously diagnosed with lymphoma and underwent initially successful chemotherapy. Six of the canines recruited presented to the Western College of Veterinary

Medicine with relapse and generalized lymph node enlargement. The canines had had at least 2 previous treatment failures and were recruited into the study upon spontaneous relapse and positive MDR biomarkers (MDR-1). Inclusion criteria included the need for owner consent; their ability to financially contribute to the treatment cost, time and travel required to receive chemotherapy; owner willingness to administer oral metformin tablets up to twice daily; and a life-expectancy of at least 6 weeks. The study protocol was approved after a full review by the University Animal Care Committee - Animal Research Ethics Board at the University of Saskatchewan (AREB# 20120063). Upon recruitment by one of two veterinary oncologists at the WCVN, the canines underwent a complete physical exam and staging that included bloodwork (complete cell counts, liver panel, electrolytes, and renal function testing), thoracic radiographs, and abdominal ultrasound prior to initiation of chemotherapy, the choice of which was left to the discretion of the treating clinicians. Oral metformin tablets were dosed on body weight with a maximum dose of 10 mg/kg, initiated as once-daily and increased as tolerated to twice daily at weekly clinic appointments.

### **Author contributions**

TGA was CoPI on the grant for the work, designed experiments, assisted in animal recruitment, interpretation of experiments, and writing of the manuscript. GFD performed the bulk of the cell culture experiments and western assessment of animal tissues. LL performed the qRT-PCR experiments and provided cell culture expertise. BT and MW analyzed the microarray datasets. PF, DB and HM were undergraduate students who contributed to the work. ZEG performed the Cytoscape, CLOVER and Transfact database analyses under CHE's supervision. CHE performed the analysis required for GEO submission. FSV and FJV prepared the figure assessing APC substrate mRNA levels in patient samples. CG and VM-D were the veterinary oncologists responsible for animal recruitment, sample retrieval and animal care, and also assisted with study/experimental design, and were co-investigators on the grant for the work. AK supervised the analysis of the microarray datasets. TAAH was the PI on the grant funding

the work, designed the experiments, supervised the work, was involved in data interpretation and assessment, and wrote the draft and final version of the manuscript.

## CONFLICTS OF INTEREST

The authors declare that they have no conflicts of interest.

## REFERENCES

- [1] Allemani, C. *et al.* Global surveillance of trends in cancer survival 2000-14 (CONCORD-3): analysis of individual records for 37 513 025 patients diagnosed with one of 18 cancers from 322 population-based registries in 71 countries. *Lancet*. **391**, 1023-1075 (2018).
- [2] Kozovska, Z., Gabrisova, V. & Kucerova, L. Colon cancer: cancer stem cell markers, drug resistance and treatment. *Biomed. Pharmacother.* **68**, 911-916 (2014).
- [3] Wang, W. *et al.* Chromosomal instability and acquired drug resistance in multiple myeloma. *Oncotarget* **8**, 78234-78244 (2017).
- [4] Xue, Y., Hou, S., Ji, H. & Han, X. Evolution from genetics to phenotype: reinterpretation of NSCLC plasticity, heterogeneity and drug resistance. *Protein Cell* **8**, 178-190 (2017).
- [5] Kartal-Yandim, M., Adan-Gokbulut, A. & Baran, Y. Molecular mechanisms of drug resistance and its reversal in cancer. *Crit. Rev. Biotechnol.* **36**, 716-726 (2016).
- [6] Zheng, H.C. The molecular mechanisms of chemoresistance in cancers. *Oncotarget* **8**, 59950-59964 (2017).
- [7] Chun, K.H., Park, J.H. & Fan, S. Predicting and Overcoming Chemotherapeutic Resistance in Breast Cancer. *Adv. Exp. Med. Bio.* **1026**, 59-104 (2017).
- [8] Reddy, S. M. Long-term survival outcomes of triple-receptor negative breast cancer survivors who are disease free at 5 years and relationship with low hormone receptor positivity. *Br. J. Cancer* **118**, 17-23 (2018).

- [9] Arnason, T. & Harkness, T. A. Development, Maintenance, and Reversal of Multiple Drug Resistance: At the Crossroads of TFPI1, ABC Transporters, and HIF1. *Cancers* **7**, 2063-2082 (2015).
- [10] Davies, G. F., Roesler, W. J., Juurlink, B. H. & Harkness, T. A. Troglitazone overcomes doxorubicin-resistance in resistant K562 leukemia cells. *Leuk. Lymphoma* **46**, 1199-1206 (2005).
- [11] Davies, G. F., Juurlink, B. H. & Harkness, T. A. Troglitazone reverses the multiple drug resistance phenotype in cancer cells. *Drug. Des. Devel. Ther.* **3**, 79-88 (2009).
- [12] Davies, G. F. *et al.* TFPI1 mediates resistance to doxorubicin in breast cancer cells by inducing a hypoxic-like response. *PLoS One* **9**, e84611 (2014).
- [13] Davies, G. F. *et al.* Metformin inhibits the development, and promotes the resensitization, of treatment-resistant breast cancer *PLoS One* **12**, e0187191 (2017).
- [14] Zi, F. *et al.* Metformin and cancer: An existing drug for cancer prevention and therapy. *Oncol. Lett.* **15**, 683-690 (2018).
- [15] Li, M., Li, X., Zhang, H. & Lu, Y. Molecular Mechanisms of Metformin for Diabetes and Cancer Treatment. *Front. Physiol.* **9**, 1039 (2018).
- [16] Safe, S., Nair, V. & Karki, K. Metformin-induced anticancer activities: recent insights. *Biol. Chem.* **399**, 321-335 (2018).
- [17] Davies, G. F., Ross, A. R., Arnason, T. G., Juurlink, B. H. & Harkness, T. A. Troglitazone inhibits histone deacetylase activity in breast cancer cells. *Cancer Lett.* **288**, 236-250 (2010).
- [18] Burma, S., Chen, B. P., Murphy, M., Kurimasa, A. & Chen, D. J. ATM phosphorylates histone H2AX in response to DNA double-strand breaks. *J. Biol. Chem.* **276**, 42462-42467 (2001).
- [19] Argnani, L., Broccoli, A. & Zinzani, P. L. Cutaneous T-cell lymphomas: Focusing on novel agents in relapsed and refractory disease. *Cancer Treat. Rev.* **61**, 61-69 (2017).
- [20] Tang, F., Choy, E., Tu, C., Hornicek, F. & Duan, Z. Therapeutic applications of histone deacetylase inhibitors in sarcoma. *Cancer Treat. Rev.* **59**, 33-45 (2017).



- [21] Kernan, J., Bonacci, T. & Emanuele, M. J. Who guards the guardian? Mechanisms that restrain APC/C during the cell cycle. *Biochim. Biophys. Acta Mol. Cell. Res.* 2018, 1924-1933 (2018).
- [22] Heim, A., Rymarczyk, B. & Mayer, T. U. Regulation of Cell Division. *Adv. Exp. Med. Biol.* **953**, 83-116 (2017).
- [23] Zhou, Z., He, M., Shah, A. A. & Wan, Y. Insights into APC/C: from cellular function to diseases and therapeutics. *Cell Div.* **11**, 9 (2016).
- [24] Naylor, R. M. & van Deursen, J. M. Aneuploidy in Cancer and Aging. *Annu. Rev. Genet.* **50**, 45-66 (2016).
- [25] Fuchsberger, T., Lloret, A. & Viña, J. New Functions of APC/C Ubiquitin Ligase in the Nervous System and Its Role in Alzheimer's Disease. *Int. J. Mol. Sci.* **18**, pii, E1057 (2017).
- [26] Harkness, T. A. A. Activating the Anaphase Promoting Complex to Enhance Genomic Stability and Prolong Lifespan. *Int. J. Mol. Sci.* **19**, pii, E1888 (2018).
- [27] Ha, K. *et al.* The anaphase promoting complex impacts repair choice by protecting ubiquitin signalling at DNA damage sites. *Nat. Commun.* **8**, 15751 (2017).
- [28] Garzón, J. *et al.* Shortage of dNTPs underlies altered replication dynamics and DNA breakage in the absence of the APC/C cofactor Cdh1. *Oncogene* **36**, 5808-5818 (2017).
- [29] Malo, M. E., Postnikoff, S. D., Arnason, T. G. & Harkness, T. A. Mitotic degradation of yeast Fkh1 by the Anaphase Promoting Complex is required for normal longevity, genomic stability and stress resistance. *Aging* **8**, 810-830 (2016).
- [30] Kucharski, T. J., Minshall, P. E., Moustafa-Kamal, M., Turnell, A. S. & Teodoro, J. G. Reciprocal Regulation between 53BP1 and the Anaphase-Promoting Complex/Cyclosome Is Required for Genomic Stability during Mitotic Stress. *Cell Rep.* **18**, 1982-1995 (2017).
- [31] Sansregret, L. *et al.* APC/C Dysfunction Limits Excessive Cancer Chromosomal Instability. *Cancer Discov.* **7**, 218-233 (2017).

- [32] Thu, K. L. *et al.* Disruption of the anaphase-promoting complex confers resistance to TTK inhibitors in triple-negative breast cancer. *Proc. Natl. Acad. Sci. USA* **115**, E1570-E1577 (2018).
- [33] Ito, D., Frantz, A. M. & Modiano, J. F. Canine lymphoma as a comparative model for human non-Hodgkin lymphoma: recent progress and applications. *Vet. Immunol. Immunopathol.* **159**, 192-201 (2014).
- [34] Seelig, D. M., Avery, A. C., Ehrhart, E. J. & Linden, M. A. The Comparative Diagnostic Features of Canine and Human Lymphoma. *Vet. Sci.* **3**, pii, 11 (2016).
- [35] McDonald, J. T. *et al.* Comparative oncology DNA sequencing of canine T cell lymphoma via human hotspot panel. *Oncotarget* **9**, 22693-22702 (2018).
- [36] Michel, D., Gaunt, M. C., Arnason, T. G. & El-Aneed, A. Development and validation of fast and simple flow injection analysis-tandem mass spectrometry (FIA-MS/MS) for the determination of metformin in dog serum. *J. Pharm. Biomed. Anal.* **107**, 229-235 (2015).
- [37] Johnston CA, MacDonald-Dickinson VS, Alcorn J, Gaunt MC. Pharmacokinetics and oral bioavailability of metformin hydrochloride in healthy mixed-breed dogs. *Am J Vet Res.* **78**, 1193-1199 (2017).
- [38] Bonnet, F. & Scheen, A. Understanding and overcoming metformin gastrointestinal intolerance. *Diabetes Obes. Metab.* **19**, 473-481 (2017).
- [39] Moioli, A. *et al.* Metformin associated lactic acidosis (MALA): clinical profiling and management. *J. Nephrol.* **29**, 783-789 (2016).
- [40] Wang, G. S. & Hoyte, C. Review of Biguanide (Metformin) Toxicity. *J. Intensive Care Med.* **885066618793385** (2018).
- [41] Wu G, Dawson E, Duong A, Haw R, Stein L. ReactomeFIViz: a Cytoscape app for pathway and network-based data analysis. *FI000Res.* **3**, 146 (2014).

- [42] Kernan, J., Bonacci, T. & Emanuele, M. J. Who guards the guardian? Mechanisms that restrain APC/C during the cell cycle. *Biochim. Biophys. Acta Mol. Cell. Res.* **1865**, 1924-1933 (2018).
- [43] Zhu, G. *et al.* Two yeast forkhead genes regulate the cell cycle and pseudohyphal growth. *Nature* **406**, 90-94 (2000).
- [44] Haase, S. B. & Wittenberg, C. Topology and control of the cell-cycle-regulated transcriptional circuitry. *Genetics* **196**, 65-90 (2014).
- [45] Kapanidou, M., Curtis, N. L. & Bolanos-Garcia, V. M. Cdc20: At the Crossroads between Chromosome Segregation and Mitotic Exit. *Trends Biochem. Sci.* **42**, 193-205 (2017).
- [46] Zhan, S. J., Liu, B. & Linghu, H. Identifying genes as potential prognostic indicators in patients with serous ovarian cancer resistant to carboplatin using integrated bioinformatics analysis. *Oncol. Rep.* **39**, 2653-2663 (2018).
- [47] Izawa D, Pines J. 2015. The mitotic checkpoint complex binds a second CDC20 to inhibit active APC/C. *Nature* 517, 631–634.
- [48] Yamaguchi, M. *et al.* Cryo-EM of mitotic checkpoint complex bound APC/C reveals reciprocal and conformational regulation of ubiquitin ligation. *Mol. Cell* 63, 593-607 (2016).
- [49] Monda, J. K. & Cheeseman, I. M. The kinetochore-microtubule interface at a glance. *J. Cell Sci.* **131**. pii, jcs214577 (2018).
- [50] Fang, Y. & Zhang, X. Targeting NEK2 as a promising therapeutic approach for cancer treatment. *Cell Cycle* **15**, 895-907 (2016).
- [51] de Wolf, B. & Kops, G. J. P. L. Kinetochore Malfunction in Human Pathologies. *Adv. Exp. Med. Biol.* **1002**, 69-91 (2017).
- [52] Yin, L. *et al.* NCAPH plays important roles in human colon cancer. *Cell Death Dis.* **8**, e2680 (2017).
- [53] Arai, T. *et al.* Regulation of NCAPG by miR-99a-3p (passenger strand) inhibits cancer cell aggressiveness and is involved in CRPC. *Cancer Med.* **7**, 1988-2002 (2018).

- [54] Hu, R. *et al.* SKA3 promotes cell proliferation and migration in cervical cancer by activating the PI3K/Akt signaling pathway. *Cancer Cell Int.* **18**, 183 (2018).
- [55] Willems, E. *et al.* The functional diversity of Aurora kinases: a comprehensive review. *Cell Div.* **13**, 7 (2018).
- [56] Park HJ, Costa RH, Lau LF, Tyner AL, Raychaudhuri P. Anaphase-promoting complex/cyclosome-CDH1-mediated proteolysis of the forkhead box M1 transcription factor is critical for regulated entry into S phase. *Mol. Cell Biol.* **28**, 5162-5171 (2008).
- [57] Frith MC, Fu Y, Yu L, Chen JF, Hansen U, Weng Z. Detection of functional DNA motifs via statistical over-representation. *Nucleic Acids Res.* **32**, 1372-1381 (2004).
- [58] Kisseberth, W. C. *et al.* A novel canine lymphoma cell line: a translational and comparative model for lymphoma research. *Leuk. Res.* **31**, 1709-1720 (2007).
- [59] Loddo M, Kingsbury SR, Rashid M, Proctor I, Holt C, Young J, El-Sheikh S, Falzon M, Eward KL, Prevost T, Sainsbury R, Stoeber K, Williams GH. Cell-cycle-phase progression analysis identifies unique phenotypes of major prognostic and predictive significance in breast cancer. *Br. J. Cancer* **100**, 959-70 (2009).
- [60] Sinha D, Duijff PHG, Khanna KK. Mitotic slippage: an old tale with a new twist. *Cell Cycle.* **18**, 7-15 (2019).
- [61] Kastl J, Braun J, Prestel A, Möller HM, Huhn T, Mayer TU. Mad2 Inhibitor-1 (M2I-1): A Small Molecule Protein-Protein Interaction Inhibitor Targeting the Mitotic Spindle Assembly Checkpoint. *ACS Chem Biol.* **10**, 1661-1666 (2015).
- [62] Li, J. *et al.* M2I-1 disrupts the in vivo interaction between CDC20 and MAD2 and increases the sensitivities of cancer cell lines to anti-mitotic drugs via MCL-1s. *Cell Div.* **14**, 5 (2019).
- [63] Lu MZ, Li DY, Wang XF. Effect of metformin use on the risk and prognosis of ovarian cancer: an updated systematic review and meta-analysis. *Panminerva Med.* Jul 8 (2019).

- [64] Mekuria AN, Ayele Y, Tola A, Mishore KM. Monotherapy with Metformin versus Sulfonylureas and Risk of Cancer in Type 2 Diabetic Patients: A Systematic Review and Meta-Analysis. *J. Diabetes Res.* **2019**, 7676909 (2019).
- [65] Shuai Y, Li C, Zhou X. The effect of metformin on gastric cancer in patients with type 2 diabetes: a systematic review and meta-analysis. *Clin. Transl. Oncol.* Feb 14 (2020).
- [66] McDonald, J. T. *et al.* Comparative oncology DNA sequencing of canine T cell lymphoma via human hotspot panel. *Oncotarget* **9**, 22693-22702 (2018).
- [67] Barutello, G. *et al.* Strengths and Weaknesses of Pre-Clinical Models for Human Melanoma Treatment: Dawn of Dogs' Revolution for Immunotherapy. *Int. J. Mol. Sci.* **19**, pii, E799 (2018).
- [68] Abdelmegeed, S. M. & Mohammed, S. Canine mammary tumors as a model for human disease. *Oncol. Lett.* **15**, 8195-8205 (2018).
- [69] Koehler, J. W. *et al.* A Revised Diagnostic Classification of Canine Glioma: Towards Validation of the Canine Glioma Patient as a Naturally Occurring Preclinical Model for Human Glioma. *J. Neuropathol. Exp. Neurol.* **77**, 1039-1054 (2018).
- [70] Amiri-Kordestani, L., Basseville, A., Kurdziel, K., Fojo, A. T. & Bates, S. E. Targeting MDR in breast and lung cancer: discriminating its potential importance from the failure of drug resistance reversal studies. *Drug Resist. Updat.* **15**, 50-61 (2012).
- [71] Ceballos, M. P. *et al.* ABC transporters: Regulation and association with multidrug resistance in hepatocellular carcinoma and colorectal carcinoma. *Curr. Med. Chem.* **26**, 1224-1250 (2019).
- [72] Robey, R. W. *et al.* Revisiting the role of ABC transporters in multidrug-resistant cancer. *Nat. Rev. Cancer* **18**, 452-464 (2018).
- [73] Domenichini, A., Adamska, A. & Falasca, M. ABC transporters as cancer drivers: Potential functions in cancer development. *Biochim. Biophys. Acta Gen. Subj.* **1863**, 52-60 (2019).

- [74] Chung, F. S., Santiago, J. S., Jesus, M. F., Trinidad, C. V. & See, M. F. Disrupting P-glycoprotein function in clinical settings: what can we learn from the fundamental aspects of this transporter? *Am. J. Cancer Res.* **6**, 1583-1598 (2016).
- [75] Kelliher, C. M. *et al.* Layers of regulation of cell-cycle gene expression in the budding yeast *Saccharomyces cerevisiae*. *Mol. Biol. Cell* **29**, 2644-2655 (2018).
- [76] Ostapenko, D., Burton, J. L. & Solomon, M. J. Identification of anaphase promoting complex substrates in *S. cerevisiae*. *PLoS One* **7**, e45895 (2012).
- [77] Ostapenko, D. & Solomon, M. J. Anaphase promoting complex-dependent degradation of transcriptional repressors Nrm1 and Yhp1 in *Saccharomyces cerevisiae*. *Mol. Biol. Cell* **22**, 2175-2184 (2011).
- [78] Sajman, J. *et al.* Degradation of Ndd1 by APC/C(Cdh1) generates a feed forward loop that times mitotic protein accumulation. *Nat. Commun.* **6**, 7075 (2015).
- [79] Koranda, M., Schleiffer, A., Endler, L. & Ammerer, G. Forkhead-like transcription factors recruit Ndd1 to the chromatin of G2/M-specific promoters. *Nature* **406**, 94-98 (2000).
- [80] Lehman, N. L. *et al.* Oncogenic regulators and substrates of the anaphase promoting complex/cyclosome are frequently overexpressed in malignant tumors. *Am. J. Pathol.* **170**, 1793-805 (2007).
- [81] Huang, H. C., Shi, J., Orth, J. D. & Mitchison, T. J. Evidence that mitotic exit is a better cancer therapeutic target than spindle assembly. *Cancer Cell* **16**, 347-358 (2009).
- [82] Qiao, X., Zhang, L., Gamper, A. M., Fujita, T. & Wan, Y. APC/C-Cdh1: from cell cycle to cellular differentiation and genomic integrity. *Cell Cycle* **9**, 3904-3912 (2010).

## FIGURE LEGENDS

**Figure 1. Changes in MDR protein biomarker levels within tumor samples from canine subjects before and after oral metformin addition.** **A.** Protein lysates were prepared from canines 2, 6, 7 and 8 for analysis by Western blotting using antibodies against MDR-1 and tubulin. The control was derived from skin samples from canine 2. Canines 2 and 6 were recruited with drug resistant lymphoma, while canines 7 and 8 were drug sensitive. Tumor samples were obtained by fine needle aspirates (FNAs) following 1 and 2 weeks of metformin treatment from canine 2. **B.** Lysates prepared from skin and tumor samples obtained from drug resistant canine 3, before and after metformin therapy, were analyzed with antibodies against the MDR markers shown, with tubulin serving as the load control. **C.** and **D.** Protein lysates prepared from skin and tumor samples from drug resistant canines 4 and 5, before and after metformin treatment, were assessed using antibodies against MDR-1, with Ponceau S representing relative load controls.

**Figure 2. Canines with MDR lymphoma tumors express a common set of highly interactive genes.**

**A.** A Venn diagram highlights a set of 290 genes overexpressed in the tumors of the four MDR canines studied. Agilent canine arrays containing over ~25,000 annotated canine genes were used to analyze mRNA obtained from tumor samples in four MDR subjects (canines 1 (sample 2) 2, 3, and 4) and normalized to control skin tissue mRNAs (canine 2). The fold change (FC) was determined by comparing the Log base 2 expression levels from the tumors with the control. A Log base 2 of 1 is equivalent to a FC of 2. A FC >3 was used as a cut-off. Bracketed numbers reflect the total number of genes above the FC 3 threshold in that subject. **B.** Cytoscape was used to analyze the 290 gene set. 146 genes were found to form 13 highly interconnected nodes. Network pathways found to be enriched within these nodes are shown. Asterisks denoting genes within the nodes that are enriched within network pathways are color coded. Nodes circled in red define Anaphase Promoting Complex substrates.

**Figure 3. mRNAs encoding APC substrates are elevated in the 4 MDR canines.** All known APC

mitotic and G1 specific substrates, to the best of our knowledge, that were identified in the arrays were assessed for differential gene expression in MDR tumor samples compared to control skin samples. The histogram in black reflects APC<sup>Cdc20</sup> mitotic substrates, while those in red define APC<sup>Cdh1</sup> targeted G1 substrates. All 5 samples from the 4 MDR canines are shown. Average values are shown in Supplemental Figure 4.

**Figure 4. Changes in APC target gene expression correlate with altered clinical responses. A.**

Cervical lymph node FNA samples were obtained from canine 4 before metformin treatment when the tumor was chemoresistant, during remission following metformin treatment, and then after relapse, with differential gene expression compared to normal skin samples using canine microarray. A Venn diagram was used to determine similarities in genes overexpressed 3 FC in the tumor, 2 FC down-regulated following remission, then 3 FC upregulated following relapse. This is predicted to identify genes specifically involved in the MDR phenotype. From this analysis, 27 genes were found to be overexpressed in chemoresistant cells, reduced upon remission, then overexpressed once again when remission failed. **B.** A STRING analysis indicates that the 27 genes were highly interconnected, with the majority of the genes encoding APC substrates (red nodes, circled in black), and genes encoding proteins required for chromosome maintenance (green and blue nodes, APC substrates circled in black). **C.** Differential gene expression was determined for the APC substrates identified in the array (shown in Figure 3) in chemoresistant tumors and following remission and relapse, compared to control skin samples. **D.** Microarray results were validated by qRT-PCR of original FNA aspirate samples for DLGAP5 (encoding HURP) and PTTG1 (encoding Securin) in canine subject 4 at study entry and remission.

**Figure 5. Elevation of MDR biomarkers and APC protein target abundance upon *in vitro* selection for chemoresistance in a canine lymphoma cell line, and reversal and resentization following APC**



**activation. A.** OSW canine lymphoma cells (OSW<sup>sens</sup>) were selected for resistance to DOX (OSW<sup>DOX</sup>). Protein lysates from chemosensitive and resistant populations were analyzed by Western analysis for multiple MDR biomarkers. **B.** qRT-PCR analysis of APC substrate and MDR marker genes in matched populations (n=3). **C.** OSW cell lysates from (A) were tested for APC-target protein abundance. **D.** Quantification of western protein abundance using ImageJ, normalized to Tubulin levels (3 rpts). **E.** Flow cytometry of sensitive and resistant OSW asynchronous cell populations. Propidium iodide fluorescence was measured. **F.** OSW canine lymphoma cells selected for DOX-resistance were exposed to 1  $\mu$ M M2I-1 for 18 hours. Protein lysates from these cells and controls were analyzed by westerns for the abundance of APC protein targets. **G.** Protein bands in (F) were quantified using ImageJ, normalized to Tubulin levels, and plotted. Three separate westerns were analyzed. **H.** OSW parental and DOX-resistant cells were pretreated with 1 or 5  $\mu$ M M2I-1 for 18 hours, then exposed to 1  $\mu$ M Doxorubicin for 48 hours. Cell viability was measured using Trypan Blue. Three biological replicates were performed.

**Supplemental Figure 1. ABC transporters do not play a critical role in the development of canine MDR lymphoma. A.** Differential gene expression of the family of ABC transporters on the canine microarray was determined for each MDR canine sample. Two samples from canine 1 were evaluated by microarray. **B.** ABC transporter gene expression changes were determined for the 2 canines (2 and 4) that were treated with metformin and analyzed by microarray. The 2 values for each gene were averaged and the SEM was plotted.

**Supplemental Figure 2. 186 genes from the 290 gene set are predicted to form a highly interconnected network based on STRING.** STRING analysis of the 290 common overexpressed genes within the tumors of MDR canines (Figure 2A) reveals a highly interconnected 186 gene set (Supplemental Table 2). The thicker the connecting edge defines higher confidence interactions. The

genes were grouped into 6 clusters, as shown by the different colored nodes. The yellow nodes are highly clustered and largely define genes involved in mitotic progression (see Supplemental Table 5). The green and purple nodes, also tightly connected to the yellow nodes, are primarily involved in chromosome maintenance and DNA repair. A significant number of these genes encode proteins known to be targeted by the Anaphase Promoting Complex (marked by an \* in Supplemental Table 5). The majority of these genes are in fact elevated in a variety of human cancer types.

**Supplemental Figure 3. Expression scores for CCNB1 within 24 different types of cancer and normal tissue.** Using the Cancer Genome Atlas (TCGA) (<https://portal.gdc.cancer.gov/>) database, we determined if expression of an APC substrate gene (CCNB1) in cancer patients is differentially regulated between normal and the tumor tissues. The numbers along the x-axis denote the number of patient samples in each cancer type. Statistical significance of the difference in expression between the normal and tumor samples are depicted for each cancer type. N.S. denotes not significant. The abbreviation of each cancer along the y-axis is represented as described in the TCGA portal.

**Supplemental Figure 4. Expression of APC substrates is highly increased in canines with MDR lymphoma, with mitotic substrates showing a greater elevation than G1 substrates.** The scores for all mitotic and G1 substrates from the 5 canine samples were averaged and plotted as shown. The top and bottom of the box define the third and first quartiles, respectively, while the median of the data divides the box. The whiskers define the error bars for the dataset.

**Supplemental Figure 5. Binding sites within the promoters of the genes in the 290 gene set are enriched for FOXM1, FOXO3A and the SP1-4 class of transcription factors.** A CLOVER analysis (<https://www.ncbi.nlm.nih.gov/pubmed/14988425>), combined with the Transfact database, identified enrichment for FOXM1 (230 genes), FOXO3A (230 genes) and SP1-4 (241 genes). A Venn diagram

was used to identify overlaps between these datasets. 225 genes were found to contain binding sites within their promoters for all three sets of transcription factors.

**Supplemental Table 1. Clinical characteristics of the MDR lymphoma canines used for the microarray analysis.** All 4 MDR canines were male/neutered with recurrent B-cell lymphoma. All canines were clinically resistant/MDR. Skin biopsy samples were taken prior to metformin treatment. Repeat FNA sampling was performed before and during MET addition to chemotherapy. MET: oral metformin in tablet form. OD: once daily. BID: twice daily. Stage III is generalized lymph node involvement of the front and back half of the body. CHOP: 4 drug chemotherapy cocktail given over 19 weeks including Cyclophosphamide, Doxorubicin (Adriamycin), Vincristine, Prednisone. CCNU is lomustine, an alkylating agent.

**Supplemental Table 2. Lists of genes upregulated >3 fold in the 4 MDR canines.** All genes differentially expressed >3 fold for the tumor samples, compared to control skin samples, were retrieved from the microarrays. Venn analyses identified a common set of 290 genes overexpressed in all 4 MDR canines. STRING analyses identified a set of 186 genes within the 290 gene set that were highly connected.

**Supplemental Table 3. Cytoscape node list for the 146 gene set (see Figure 2B).** The 290 gene set was analyzed using the Cytoscape online tool. 13 interconnected nodes, composed of 146 genes, were identified that defined pathways involved in DNA repair and cell cycle progression through mitosis.

**Supplemental Table 4. Cytoscape network pathway enrichment for 146 gene set (see Figure 2B).** Network, Biological and Cell Component pathways were identified from the 146 gene network indicating the number of total genes in the complete gene set and the number found in our network. The enrichment

was indicated by the p-value.

**Supplemental Table 5. Gene clustering from the STRING analysis identifies a set of genes within the 186 gene set that defines progression through mitosis as a key regulator of MDR development.**

The clusters identified in Supplemental Figure 2 were listed and categorized in terms of function based on review of the literature. Genes highlighted in yellow define genes involved in mitotic progression, while genes highlighted in green define genes involved in DNA replication and repair. \* denotes APC substrates; \*\* denotes kinetochore and Spindle Assembly Checkpoint associated proteins; \*\*\* denotes components of the chromosome condensin complex.

**Supplemental Table 6. Analyses of genes identified as responsive to clinical chemoresistance, remission, and relapse in canine 4.**

A Venn diagram comparing genes overexpressed >3 fold in the chemoresistant tumor, down-regulated >2 fold upon remission, and >3 fold following relapse in canine 4, identified 27 genes in common. Each pairwise comparison was listed. STRING interactions were identified for each comparison. As above, genes highlighted in yellow define genes involved in mitotic progression, while genes highlighted in green define genes involved in DNA replication and repair. \* denotes APC substrates; \*\* denotes kinetochore and Spindle Assembly Checkpoint associated proteins; \*\*\* denotes components of the chromosome condensin complex.

## Figure 1

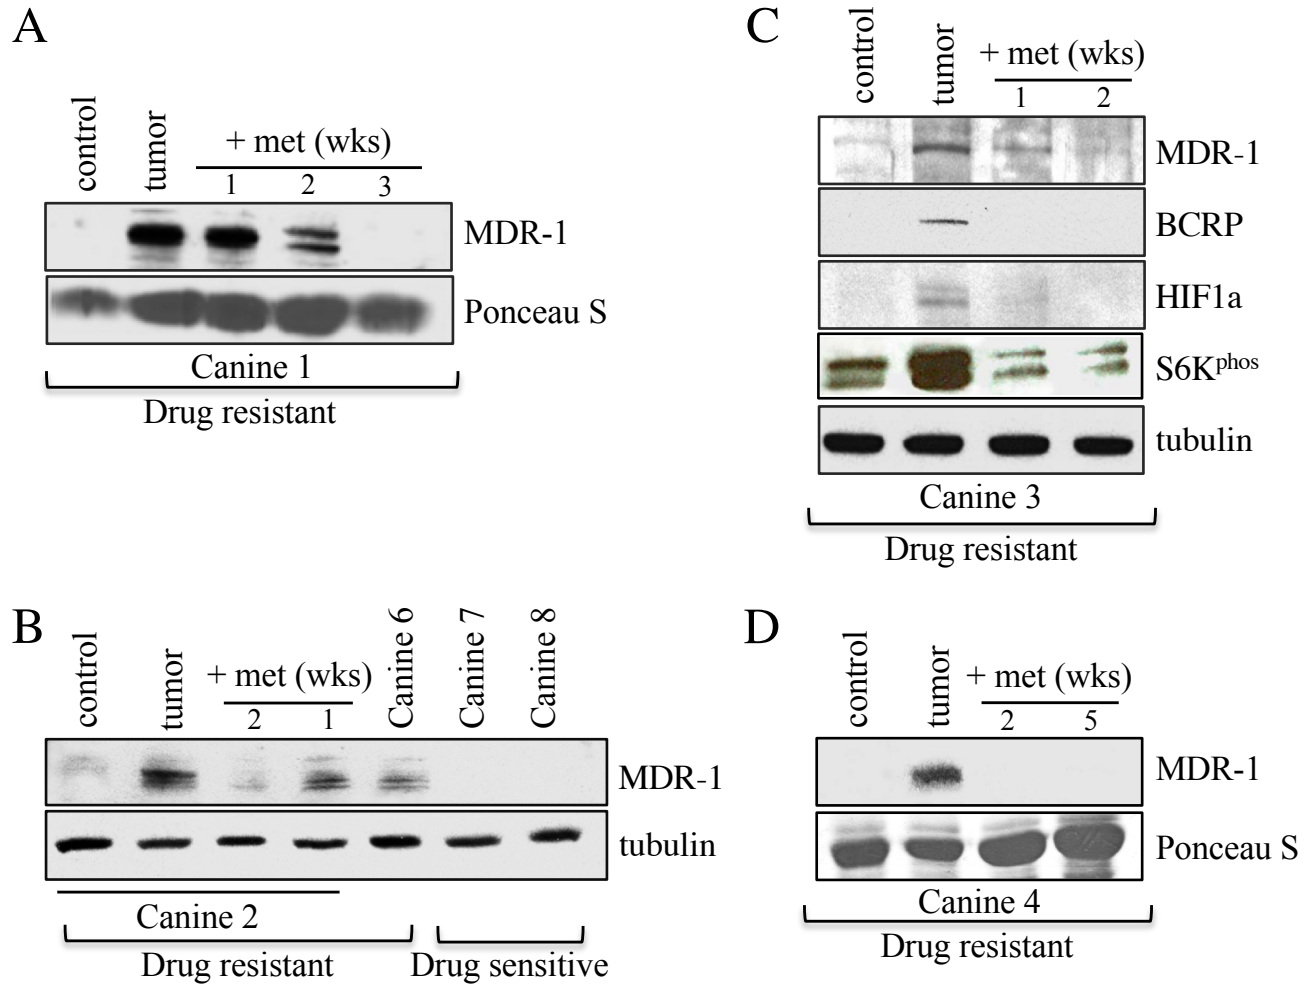

## Figure 2

A

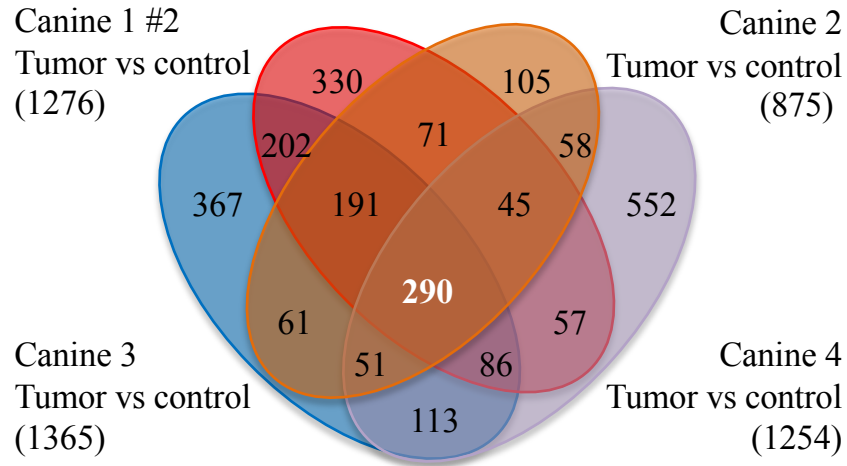

B

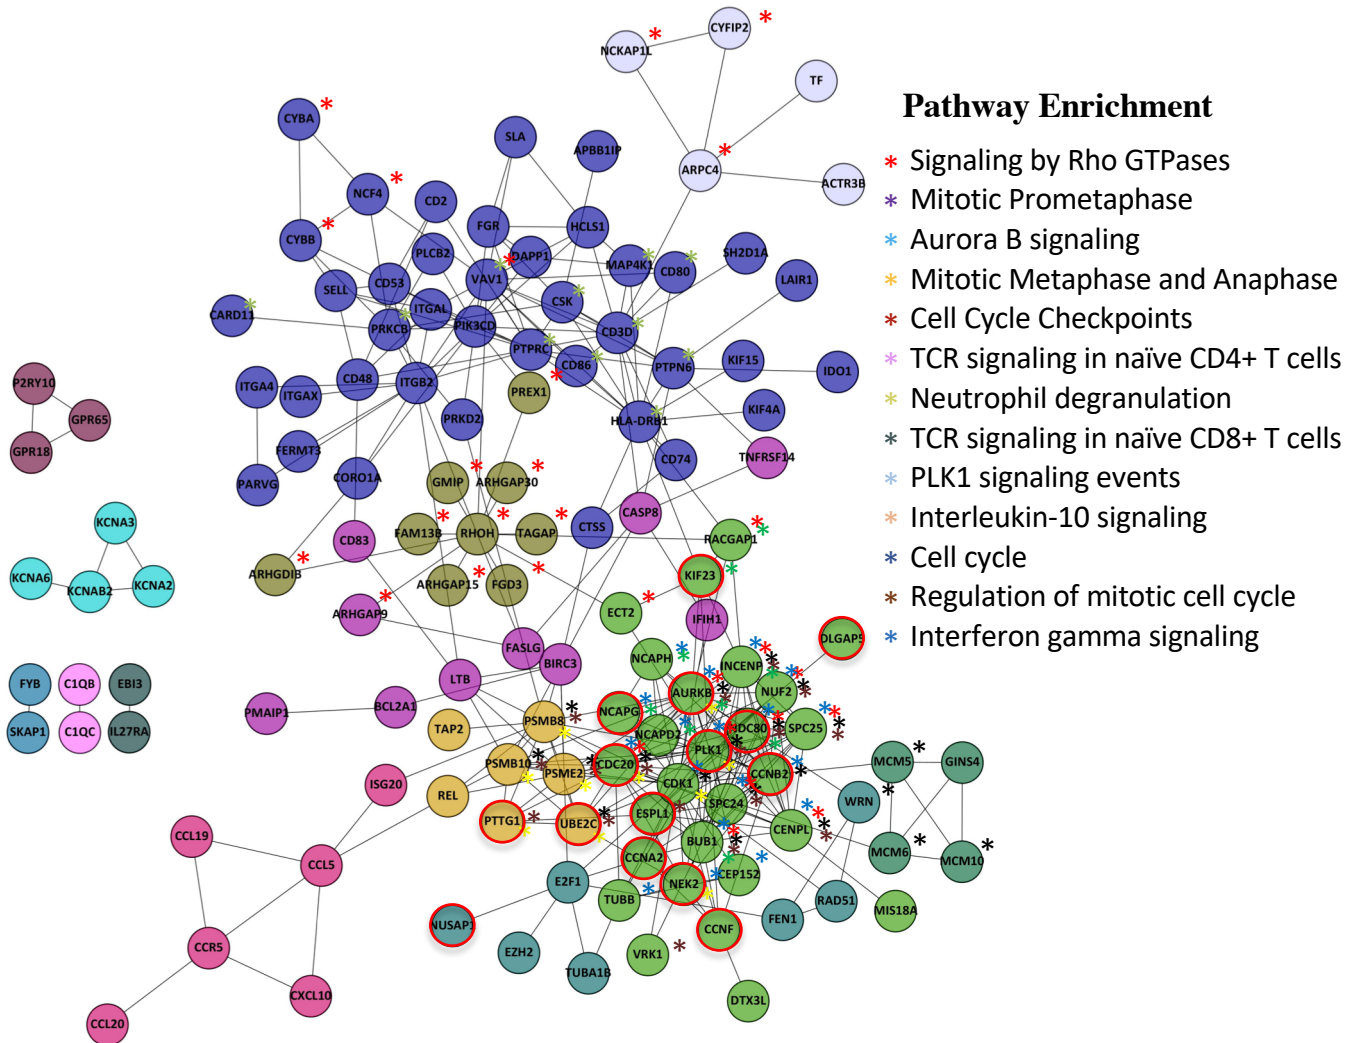

Figure 3

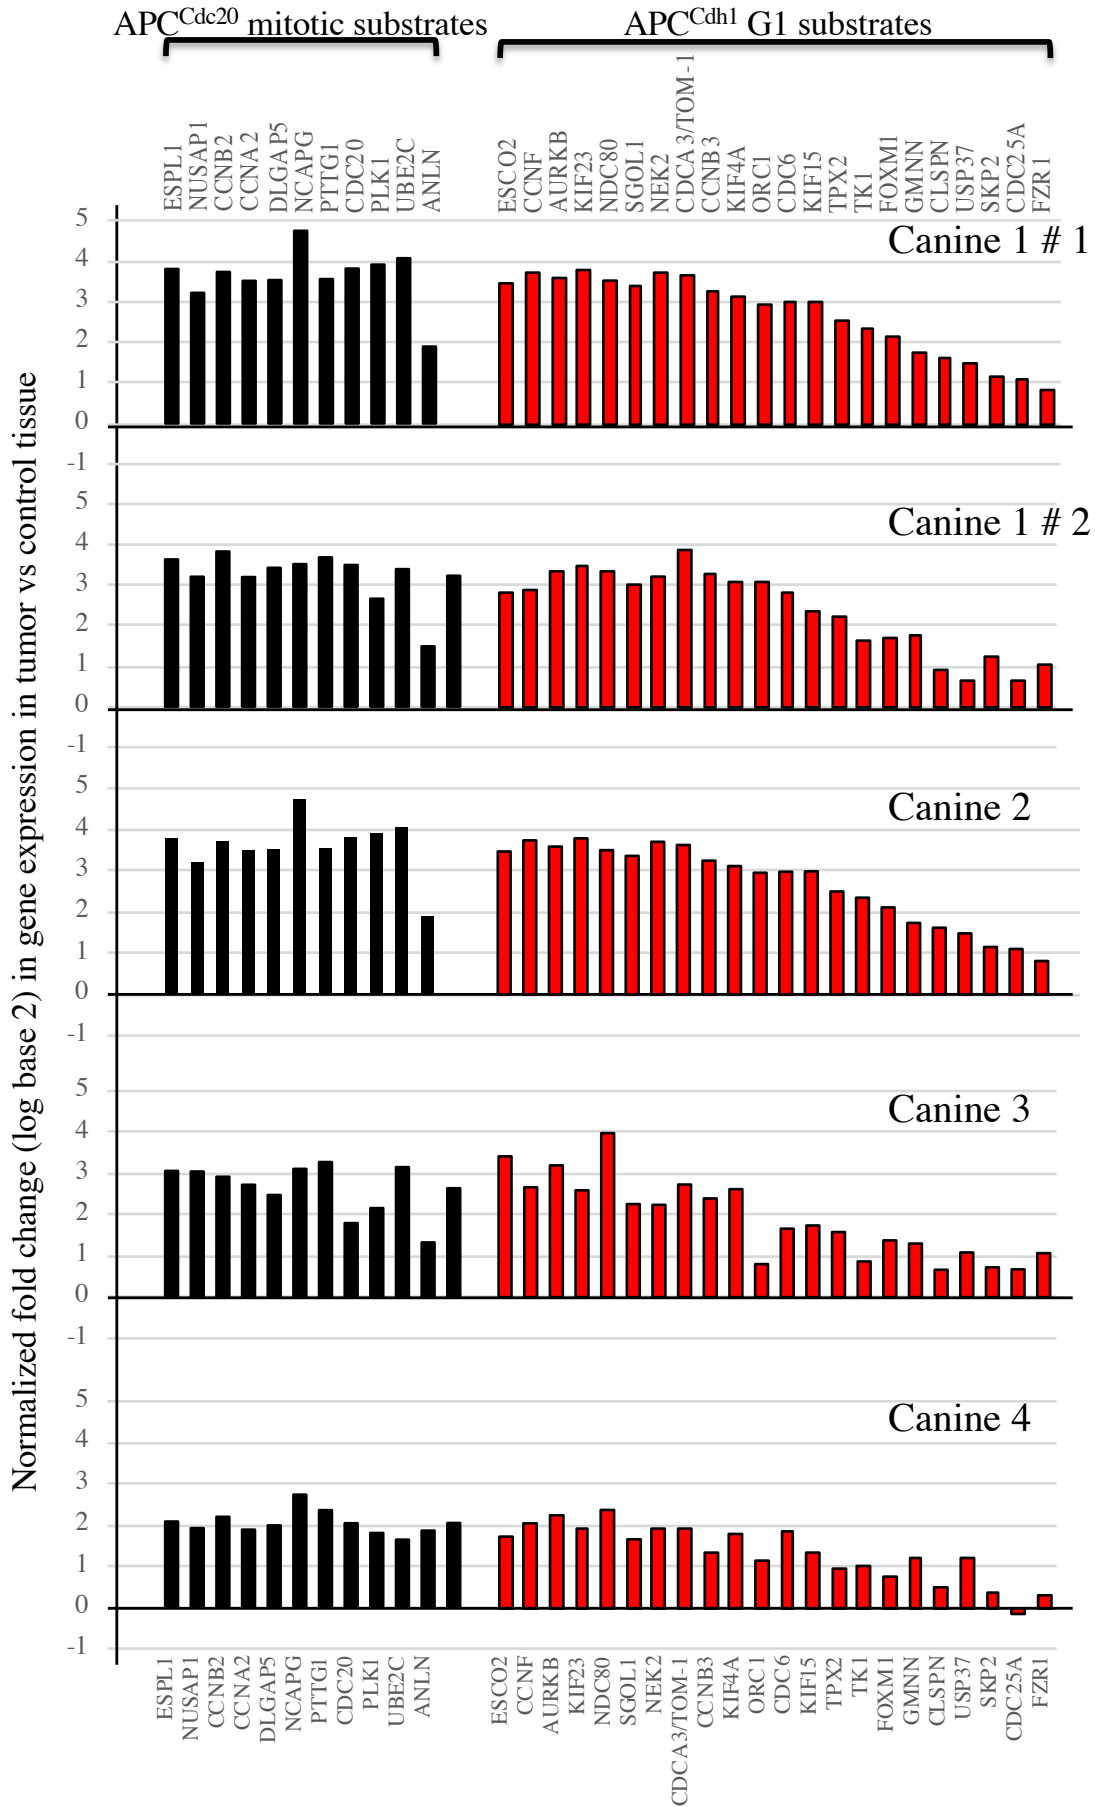

## Figure 4

**A** Canine 4

Tumor vs control  
>3 FC up

Tumor +/- met  
>2 FC down

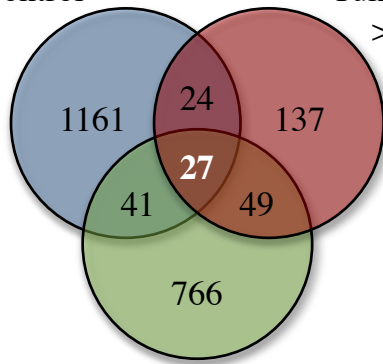

Relapse vs remission vs control >3 FC up

**B**

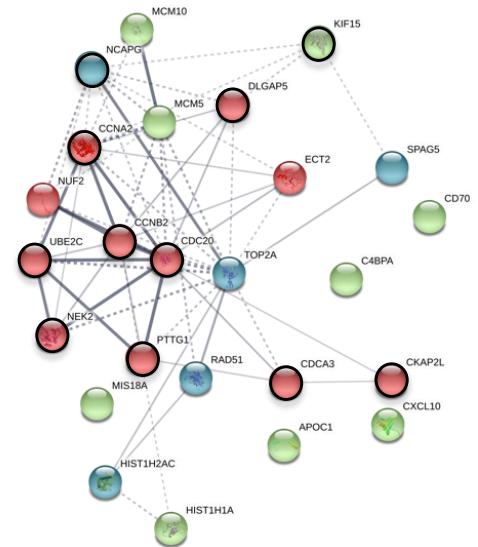

**C**

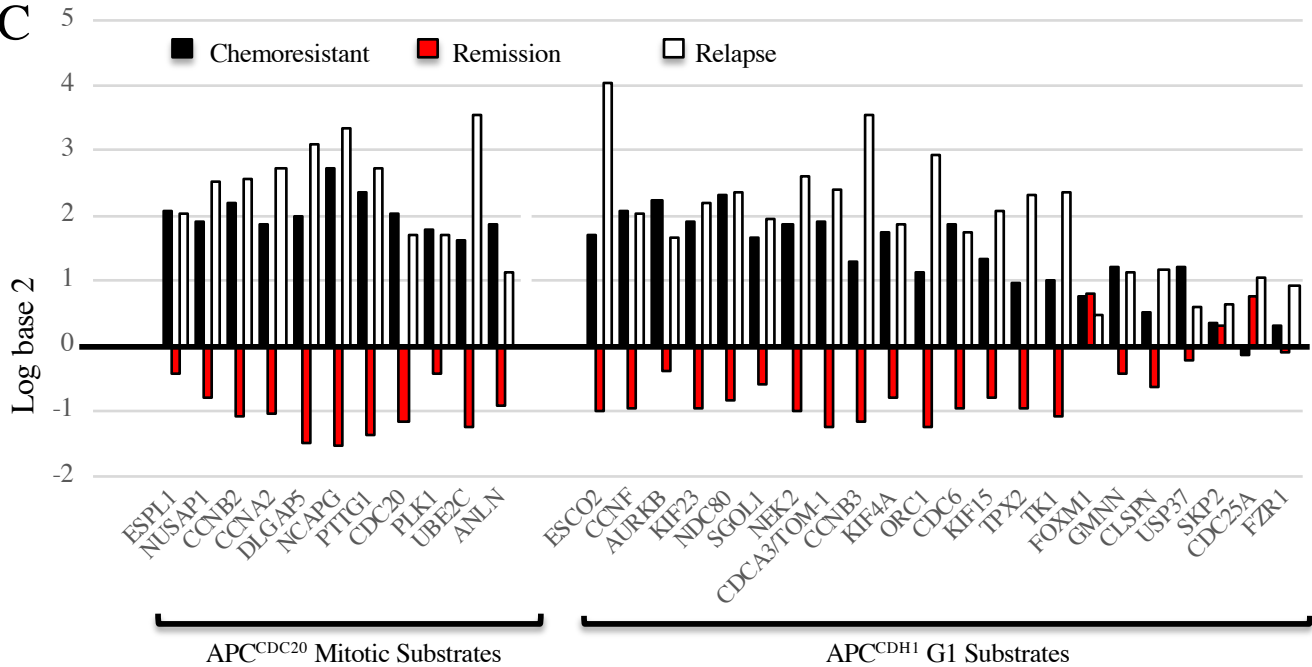

**D**

Canine 4 lymph node biopsy

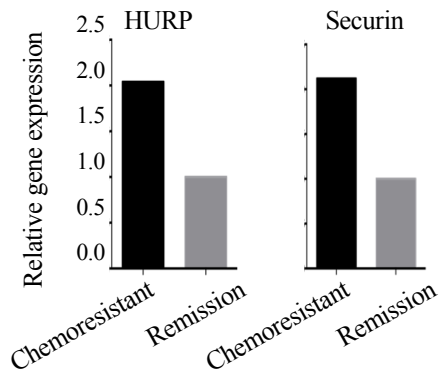



## New Figure 5

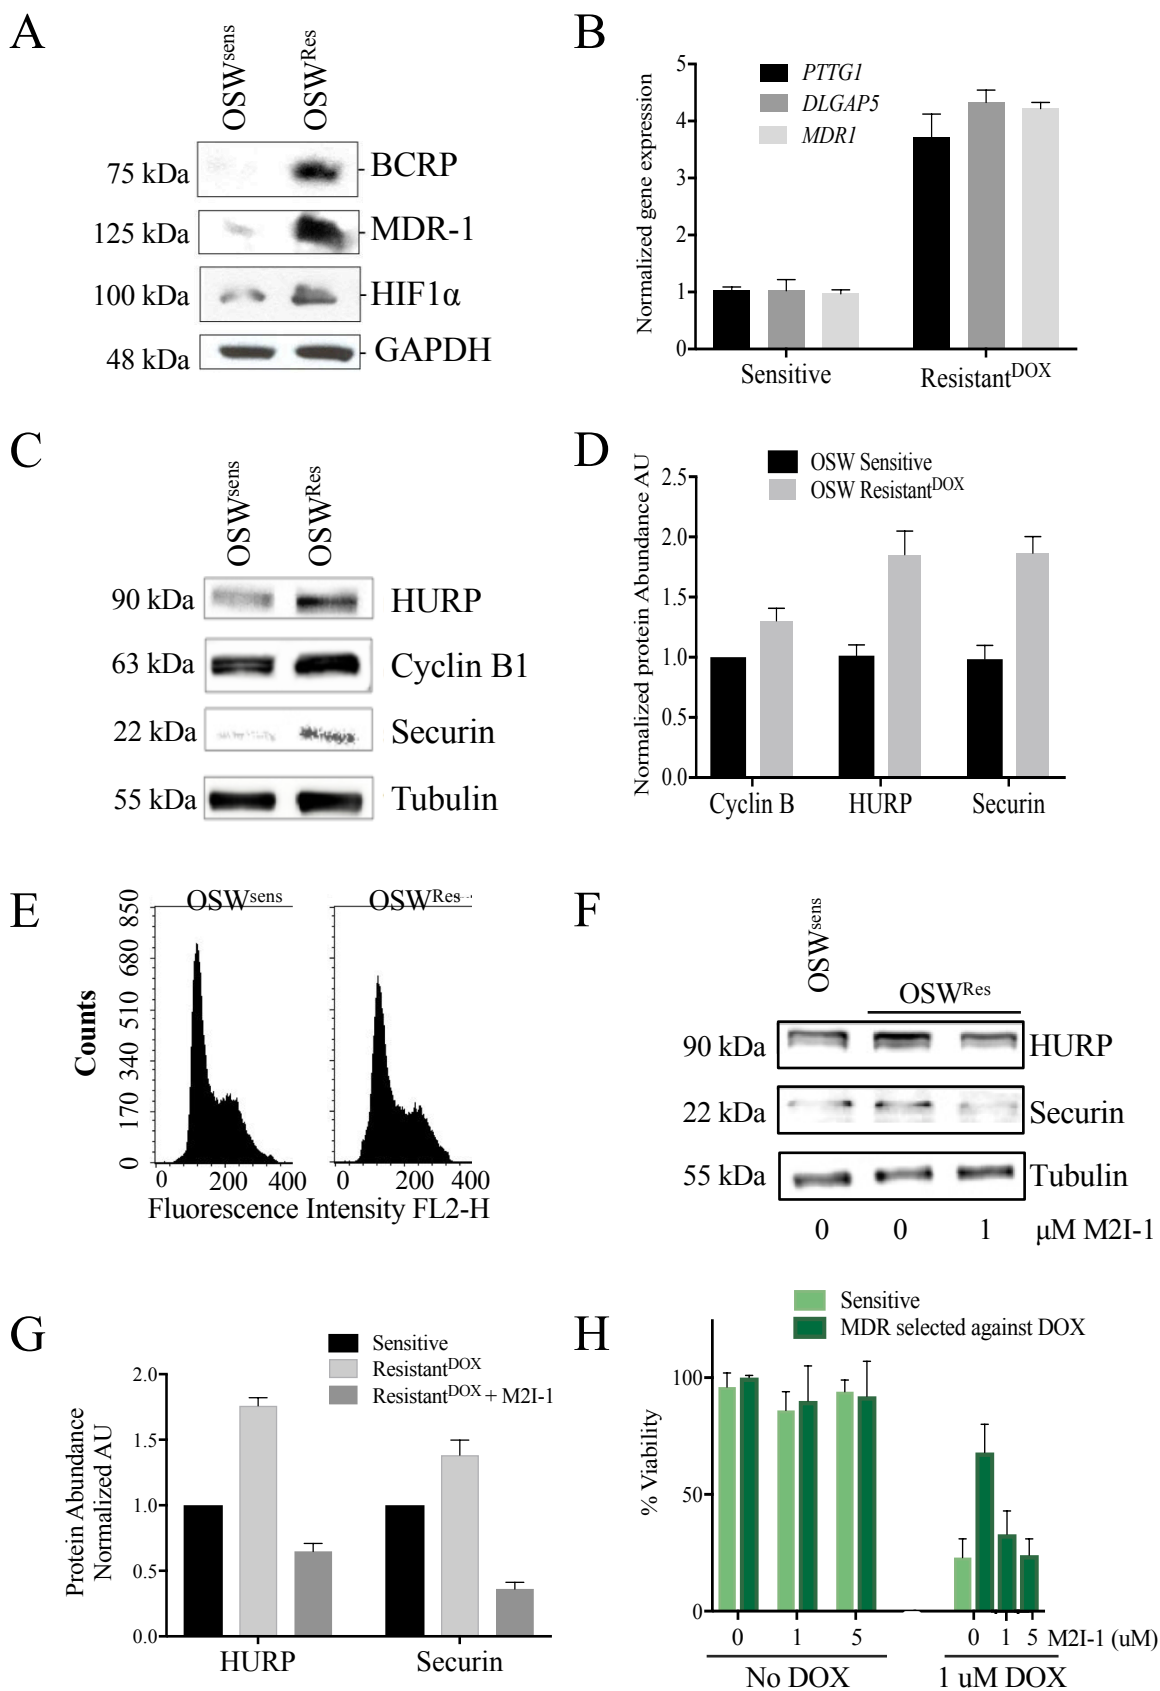

## Supplemental Figure 1

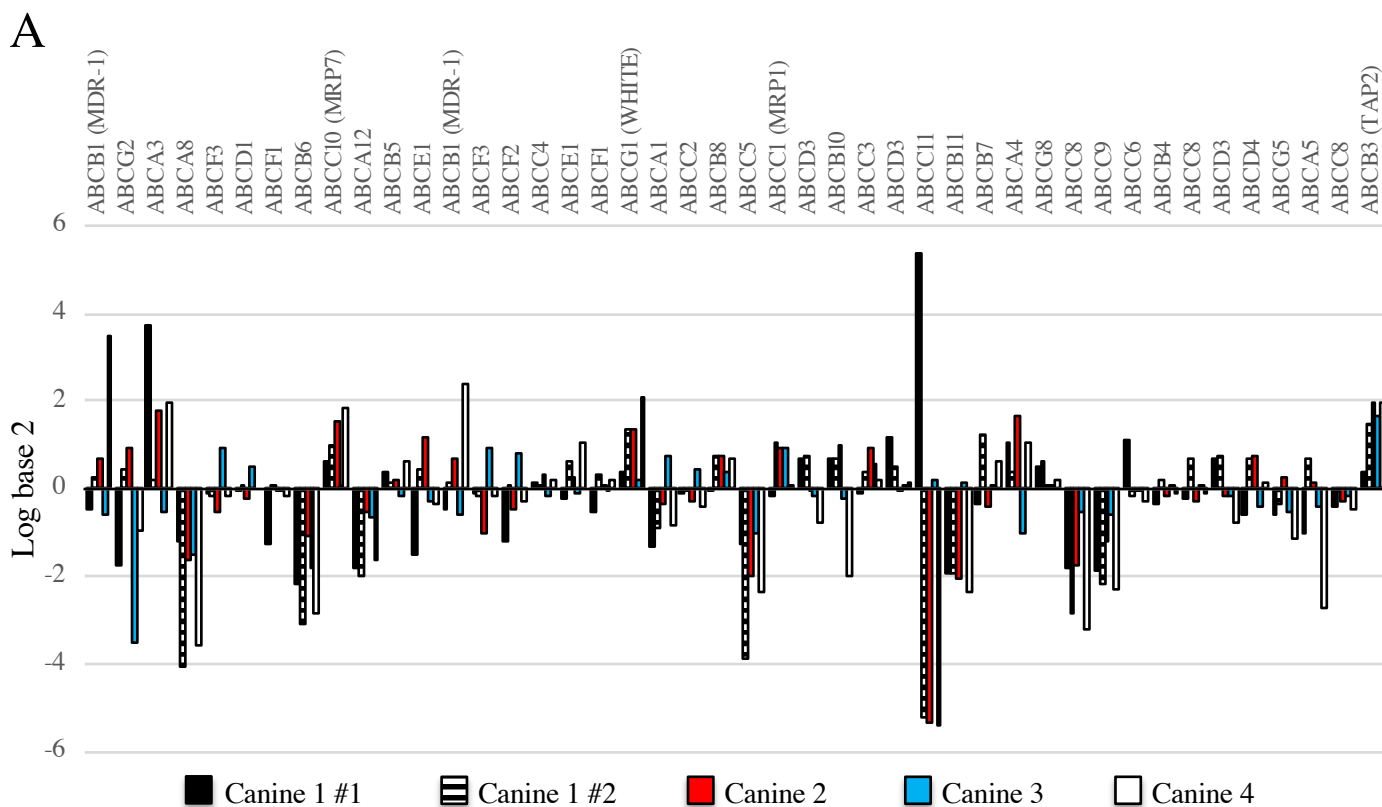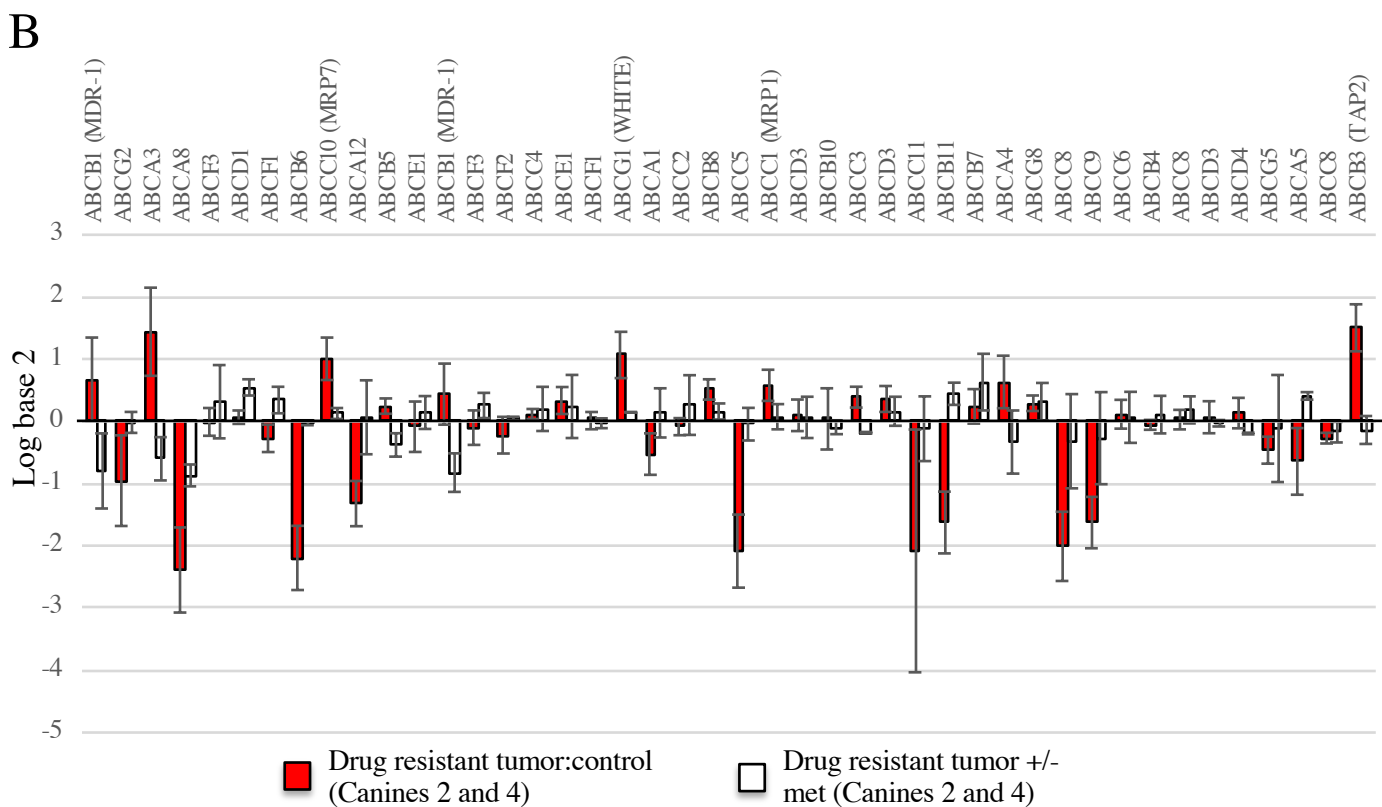

## Supplemental Figure 2

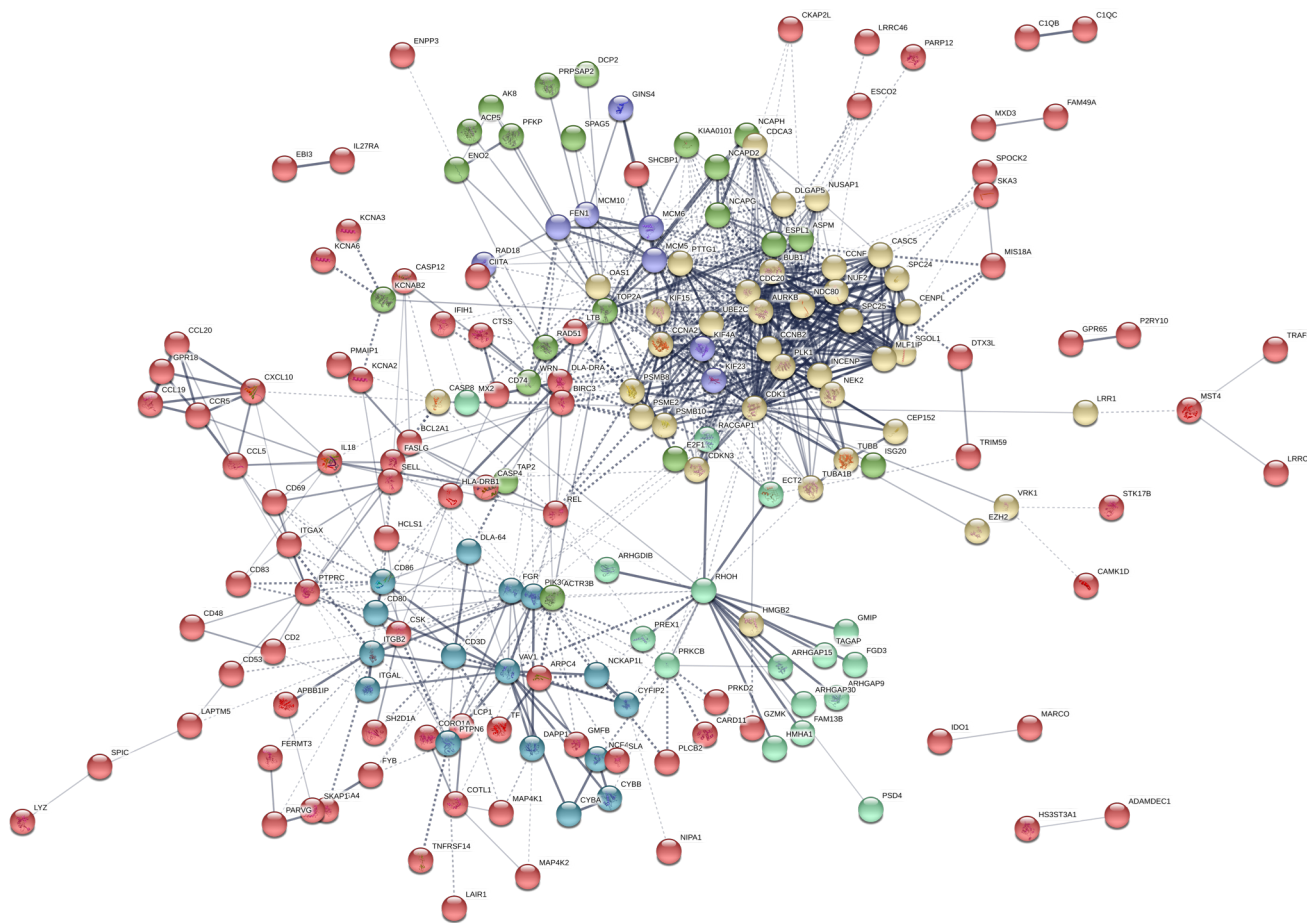

## Supplemental Figure 3

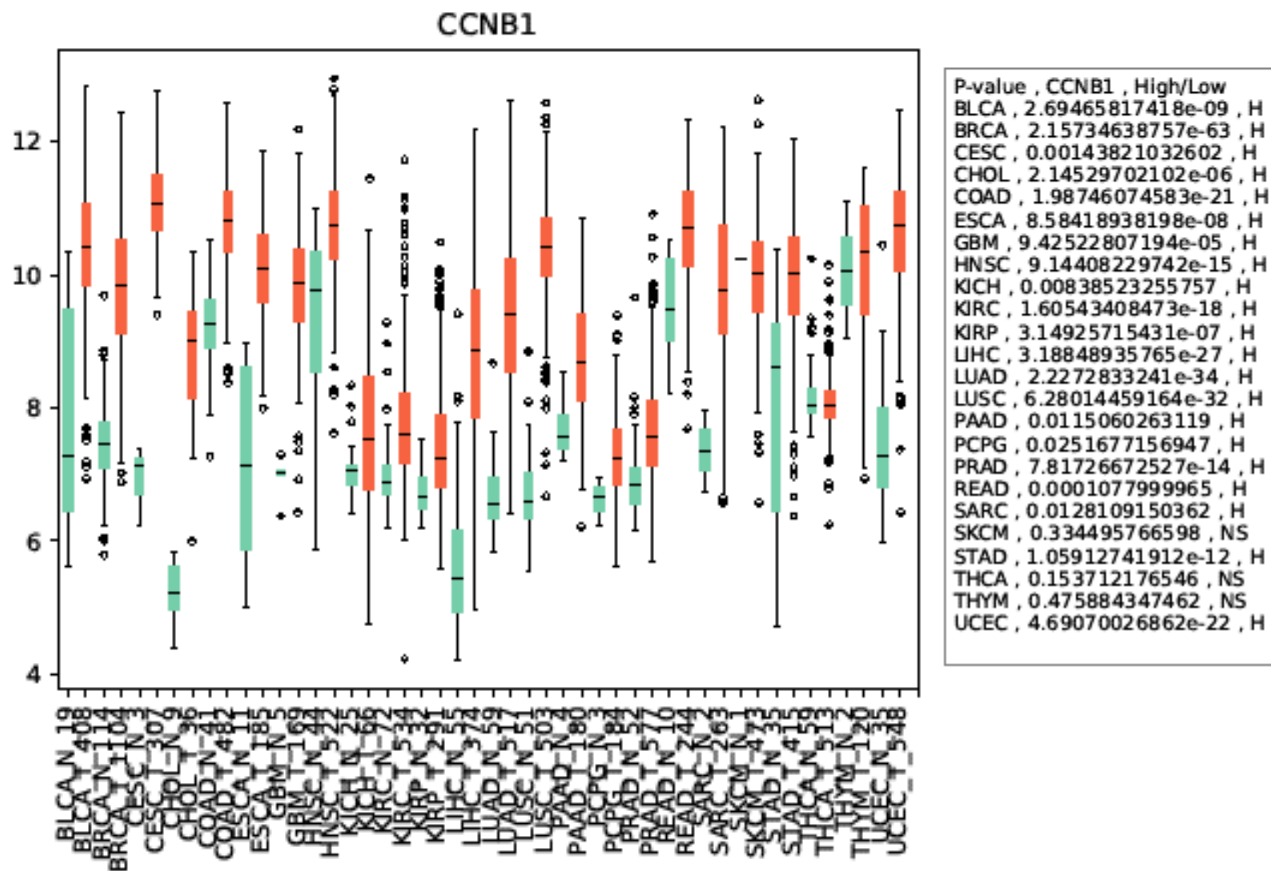

## Supplemental Figure 4

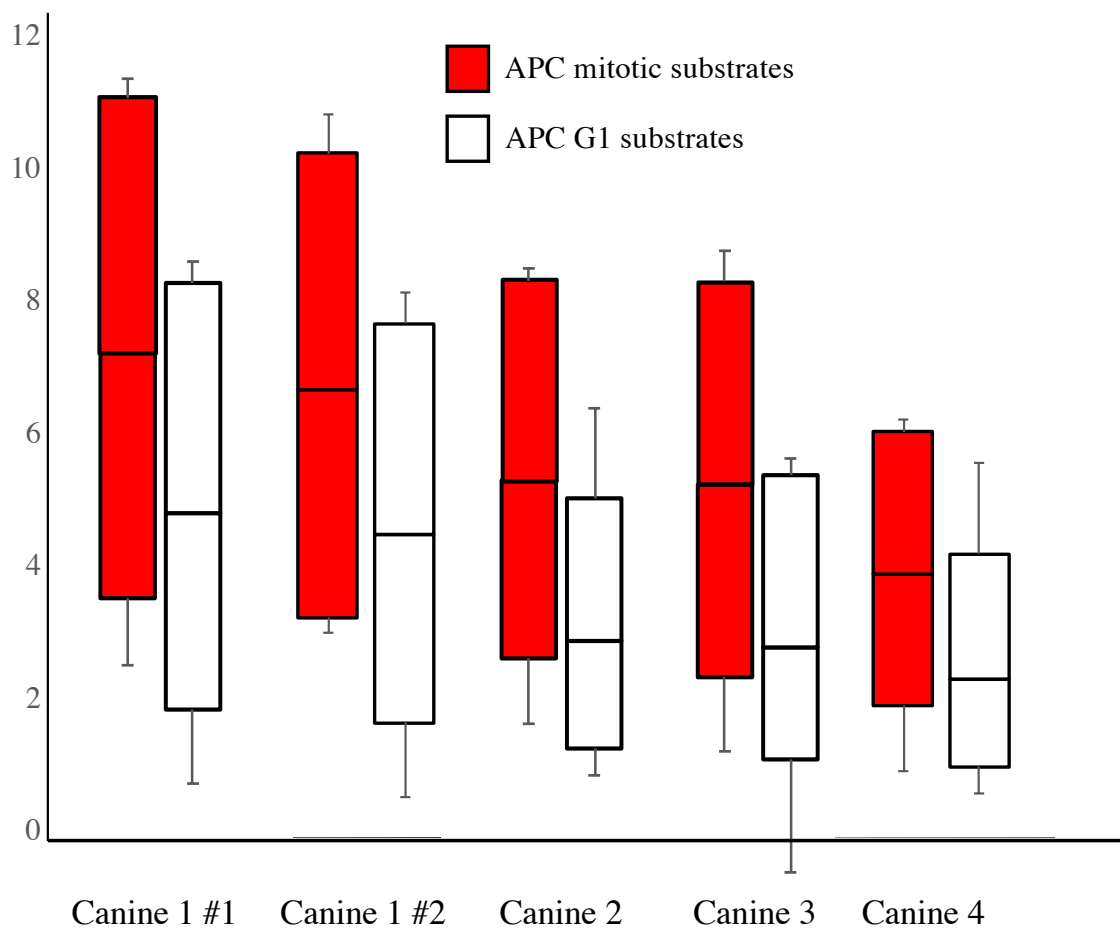

# Supplemental Figure 5

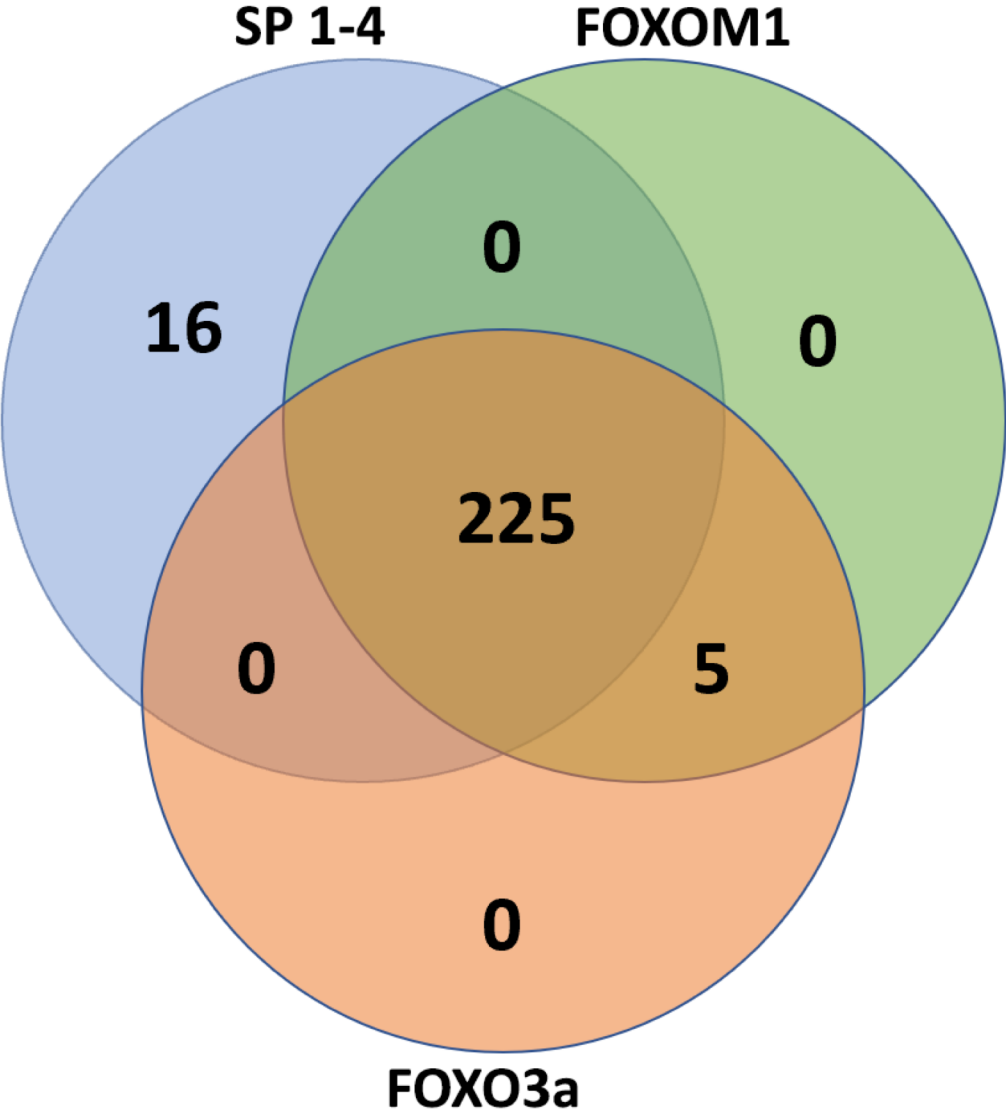

## Supplemental Table 1

| Case ID number | Breed             | Age   | B vs T cell lymphoma | Stage | Chemotherapy at times of sampling                                              | Clinical response to therapy                              | MET duration | MET dose                  | Time to death after MET | Overall survival (diagnosis to death) |
|----------------|-------------------|-------|----------------------|-------|--------------------------------------------------------------------------------|-----------------------------------------------------------|--------------|---------------------------|-------------------------|---------------------------------------|
| 1              | Golden Retriever  | 10 yr | B                    | III   | CHOP with MET                                                                  | No, enlarged lymph nodes remained                         | 108 days     | 250 mg OD                 | 184 days                | 254 days                              |
| 2              | Lab Retriever mix | 5 yr  | B                    | III   | CHOP with MET                                                                  | No, enlarged lymph nodes remained                         | 81 days      | 500 mg BID                | 87 days                 | 277 days                              |
| 3              | Retriever mix     | 7 yr  | B                    | III   | DOX with MET                                                                   | No, enlarged lymph nodes remained                         | 138 days     | 500 mg BID                | 143 days                | 184 days                              |
| 4              | Lab Retriever mix | 11yr  | B                    | III   | CHOP failed then rescue with CCNU failed, then MET added to CHOP and remission | Yes/No, Remission attained for 8 weeks then relapse again | 84 days      | 250 mg OD then 250 mg BID | 91 days                 | 261 days                              |
